# Supplementary material for: Rapid Characterization of Triterpene Saponins from Zornia brasiliensis by HPLC-ESI-MS/MS
Source: PubMed Central journal article supplement (PMC6680687; doi:10.3390/molecules24142519), 2019-07-10
Supplement: molecules-24-02519-s001.pdf [file molecules-24-02519-s001.pdf]

# Rapid characterization of triterpene saponins from *Zornia brasiliensis* by HPLC-ESI-MS/MS

Yuri Manguiera Nascimento <sup>1</sup>, Lucas Silva Abreu <sup>1</sup>, Ramon Leal Lima <sup>1</sup>, Vicente Carlos O. Costa <sup>1</sup>, José Iranildo Miranda de Melo <sup>2</sup>, Raimundo Braz-Filho <sup>3</sup>, Marcelo Sobral Silva <sup>1</sup>, and Josean Fechine Tavares <sup>1,\*</sup>

<sup>1</sup> Graduate Program in Natural and Synthetic Bioactive Products, Health Sciences Center, Universidade Federal da Paraíba, 58051-900, João Pessoa, Paraíba, Brazil; yurimanguiera@ltf.ufpb.br; lucas.abreu@ltf.ufpb.br; ramonlima.fr@hotmail.com

<sup>2</sup> Graduate Program in Ecology and Conservation, Department of Biology, Center for Biological and Health Sciences, 58429-500, Campina Grande, Paraíba, Brazil; tournefort@gmail.com

<sup>3</sup> Center of Sciences and Technologies, Darcy Ribeiro Norte Fluminense State University, 28013-600 Campos dos Goytacazes, Rio de Janeiro, Rio de Janeiro, Brazil; braz@uenf.br

\* Correspondence: josean@ltf.ufpb.br; Tel.: +55-83-3216-7427.

## Supporting Information

|                    | Table of contents                                                                                                                                        | Page |
|--------------------|----------------------------------------------------------------------------------------------------------------------------------------------------------|------|
| <b>Table 1.</b>    | Comparative <sup>13</sup> C and <sup>1</sup> H NMR data of <b>25</b> in DMSO- <i>d</i> <sub>6</sub> (100 and 500 MHz) of the sapogenin of Soyasaponin II | 3    |
| <b>Table 2.</b>    | Comparative <sup>13</sup> C and <sup>1</sup> H NMR data of <b>25</b> in DMSO- <i>d</i> <sub>6</sub> (100 and 500 MHz) of the sugars of Soyasaponin II    | 4    |
| <b>Figure S1.</b>  | <sup>1</sup> H-NMR (500 MHz, DMSO- <i>d</i> <sub>6</sub> ) spectrum of compound <b>25</b>                                                                | 5    |
| <b>Figure S2.</b>  | <sup>13</sup> C-NMR (100 MHz, DMSO- <i>d</i> <sub>6</sub> ) spectrum of compound <b>25</b>                                                               | 5    |
| <b>Figure S3.</b>  | HSQC (500 x 125 MHz, DMSO- <i>d</i> <sub>6</sub> ) spectrum of compound <b>25</b>                                                                        | 6    |
| <b>Figure S4.</b>  | HMBC (500 x 125 MHz, DMSO- <i>d</i> <sub>6</sub> ) spectrum of compound <b>25</b>                                                                        | 6    |
| <b>Figure S5.</b>  | Expansion of HMBC (500 x 125 MHz, DMSO- <i>d</i> <sub>6</sub> ) spectrum of compound <b>25</b>                                                           | 7    |
| <b>Figure S6.</b>  | Expansion of HMBC (500 x 125 MHz, DMSO- <i>d</i> <sub>6</sub> ) spectrum of compound <b>25</b>                                                           | 7    |
| <b>Figure S7.</b>  | The HRESI-TOF-MS spectrum of compound <b>25</b>                                                                                                          | 8    |
| <b>Figure S8.</b>  | The ESI-MS/MS spectrum of compound <b>25</b>                                                                                                             | 8    |
| <b>Figure S9.</b>  | The ESI-MS/MS spectrum of compounds <b>1</b> and <b>2</b>                                                                                                | 9    |
| <b>Figure S10.</b> | The ESI-MS/MS spectrum of compounds <b>3</b> and <b>4</b>                                                                                                | 10   |
| <b>Figure S11.</b> | The ESI-MS/MS spectrum of compounds <b>5</b> , <b>7</b> , <b>8</b> and <b>14</b>                                                                         | 11   |
| <b>Figure S12.</b> | The ESI-MS/MS spectrum of compounds <b>9</b> and <b>10</b>                                                                                               | 12   |

|                    |                                                                                                                                                                                                                                                                                                                 |           |
|--------------------|-----------------------------------------------------------------------------------------------------------------------------------------------------------------------------------------------------------------------------------------------------------------------------------------------------------------|-----------|
| <b>Figure S13.</b> | The ESI-MS/MS spectrum of compounds <b>11, 12, 13</b> and <b>15</b>                                                                                                                                                                                                                                             | <b>13</b> |
| <b>Figure S14.</b> | The ESI-MS/MS spectrum of compounds <b>16, 18, 19</b> and <b>22</b>                                                                                                                                                                                                                                             | <b>14</b> |
| <b>Figure S15.</b> | The ESI-MS/MS spectrum of compound <b>20</b>                                                                                                                                                                                                                                                                    | <b>15</b> |
| <b>Figure S16.</b> | The ESI-MS/MS spectrum of compounds <b>21, 31, 32, 33</b> and <b>35</b>                                                                                                                                                                                                                                         | <b>16</b> |
| <b>Figure S17.</b> | The ESI-MS/MS spectrum of compounds <b>24, 26,</b> and <b>29</b>                                                                                                                                                                                                                                                | <b>17</b> |
| <b>Figure S18.</b> | The ESI-MS/MS spectrum of compounds <b>27, 28, 30</b> and <b>34</b>                                                                                                                                                                                                                                             | <b>18</b> |
| <b>Figure S19.</b> | Fragmentation pathway of compounds <b>28</b> ( <i>m/z</i> 779.4562), <b>30</b> ( <i>m/z</i> 895.5043) and <b>34</b> ( <i>m/z</i> 749.4485) having olean-12-ene-3 $\beta$ ,diol ( <i>m/z</i> 441 or 439) as aglycone in negative mode ESI-MS/MS                                                                  | <b>19</b> |
| <b>Figure S20.</b> | Fragmentation pathway of compounds <b>21</b> ( <i>m/z</i> 939.4935), <b>31</b> ( <i>m/z</i> 793.4348), <b>32</b> ( <i>m/z</i> 909.4843), <b>33</b> ( <i>m/z</i> 763.4286) and <b>35</b> ( <i>m/z</i> 631.3856), which have soyasapogenol E ( <i>m/z</i> 455) as aglycone, in negative mode ESI-MS/MS            | <b>19</b> |
| <b>Figure S21</b>  | Fragmentation pathway of compounds <b>23</b> ( <i>m/z</i> 941.5123), <b>24</b> ( <i>m/z</i> 795.4520), <b>25</b> ( <i>m/z</i> 911.5006), <b>26</b> ( <i>m/z</i> 765.4418) and <b>29</b> ( <i>m/z</i> 633.3998), which possess soyasapogenol B ( <i>m/z</i> 457) as aglycone, in negative mode ESI-MS/MS         | <b>20</b> |
| <b>Figure S22.</b> | Fragmentation pathway of compounds <b>5</b> ( <i>m/z</i> 957.5056), <b>8</b> ( <i>m/z</i> 811.4459), <b>6</b> ( <i>m/z</i> 927.4943), <b>7</b> ( <i>m/z</i> 781.4350) and <b>14</b> ( <i>m/z</i> 649.3933), which have soyasapogenol A ( <i>m/z</i> 473) as aglycone, in negative mode ESI-MS/MS                | <b>20</b> |
| <b>Figure S23</b>  | Fragmentation pathway of compounds <b>16</b> ( <i>m/z</i> 999.5135), <b>18</b> ( <i>m/z</i> 853.4559), <b>17</b> ( <i>m/z</i> 969.5074), <b>19</b> ( <i>m/z</i> 823.4463) and <b>22</b> ( <i>m/z</i> 691.4042), which have 21-acetoxy-soyasapogenol A ( <i>m/z</i> 515) as aglycone, in negative mode ESI-MS/MS | <b>21</b> |
| <b>Figure S24.</b> | Fragmentation pathway of compounds <b>11</b> ( <i>m/z</i> 997.5022), <b>12</b> ( <i>m/z</i> 851.4412), <b>13</b> ( <i>m/z</i> 967.4901) and <b>15</b> ( <i>m/z</i> 821.4303), which have aglycone I ( <i>m/z</i> 513) as aglycone, in negative mode ESI-MS/MS                                                   | <b>21</b> |
| <b>Figure S25.</b> | Fragmentation pathway of compounds <b>1</b> ( <i>m/z</i> 925.4800) and <b>2</b> ( <i>m/z</i> 779.4239), which have wistariasapogenol A ( <i>m/z</i> 471) as aglycone, in negative mode ESI-MS/MS                                                                                                                | <b>22</b> |
| <b>Figure S26.</b> | Fragmentation pathway of compounds <b>3</b> ( <i>m/z</i> 797.4310) and <b>4</b> ( <i>m/z</i> 943.4912), which have kudzusapogenol A ( <i>m/z</i> 485) as aglycone, in negative mode ESI-MS/MS                                                                                                                   | <b>22</b> |
| <b>Figure S27.</b> | Fragmentation pathway of compounds <b>9</b> ( <i>m/z</i> 985.4961) and <b>10</b> ( <i>m/z</i> 839.4404) having aglycone II ( <i>m/z</i> 531) and that of compound <b>20</b> ( <i>m/z</i> 837.4603), which has 22- <i>O</i> -acetate-soyasapogenol B ( <i>m/z</i> 499) as aglycone, in negative mode ESI-MS/MS   | <b>23</b> |

**Table 1.** Data of  $^{13}\text{C}$  and  $^1\text{H}$  NMR data of **25** in DMSO- $d_6$  (100 and 500 MHz) of the sapogenin of Soyasaponin II [30].

|                       |                     | HSQC                             |                   | HMBC              |  |
|-----------------------|---------------------|----------------------------------|-------------------|-------------------|--|
| <b>C</b>              | $\delta_{\text{C}}$ | $\delta_{\text{H}}$              | $^2J_{\text{CH}}$ | $^3J_{\text{CH}}$ |  |
| 4                     | 43.3                | -                                | -                 | -                 |  |
| 8                     | 41.8                | -                                | -                 | -                 |  |
| 10                    | 36.0                | -                                | -                 | -                 |  |
| 13                    | 144.3               | -                                | -                 | -                 |  |
| 14                    | 43.3                | -                                | -                 | -                 |  |
| 17                    | 37.0                | -                                | -                 | -                 |  |
| 20                    | 30.3                | -                                | -                 | -                 |  |
| <b>CH</b>             |                     |                                  |                   |                   |  |
| 3                     | 90.0                | 3.12 (m)                         | -                 | -                 |  |
| 5                     | 55.5                | nd                               | -                 | -                 |  |
| 9                     | 46.9                | 1.47 (m)                         | C-8/C-10/<br>C-11 | C-1/Me-25/ Me-26  |  |
| 12                    | 121.7               | 5.16 (sl)                        | -                 | C-9/C-18          |  |
| 18                    | 44.7                | nd                               | -                 | -                 |  |
| 22                    | 74.2                | 3.23 (sl)                        | -                 | -                 |  |
| <b>CH<sub>2</sub></b> |                     |                                  |                   |                   |  |
| 1                     | 38.4                | 1.52 (m); 0.89 (m)               | C-10              | C-9               |  |
| 2                     | 25.4                | 1.65 (d, $J = 9.5$ Hz); 0.92 (m) | -                 | -                 |  |
| 6                     | 18.1                | 1.52 (m); 1.30 (m)               | C-7               | C-10              |  |
| 7                     | 32.7                | 1.44 (m); 1.28 (m)               | C-8               | Me-26             |  |
| 11                    | 23.3                | 1.28 (m)                         | -                 | -                 |  |
| 15                    | 25.6                | 1.99 (m); 0.91 (m)               | -                 | -                 |  |
| 16                    | 28.0                | 1.33 (m); 0.95 (m)               | C-17              | C-22              |  |
| 19                    | 46.1                | 1.67 (m); 0.88 (m)               | C-18              | Me29/ Me-30       |  |
| 21                    | 41.2                | 1.30 (m)                         | C-20/C-22         | C-17/C-30         |  |
| 24                    | 61.6                | 3.80 (d, $J = 11$ Hz); 3.04 (m)  | -                 | C-3/C-23          |  |
| <b>CH<sub>3</sub></b> |                     |                                  |                   |                   |  |
| 23                    | 22.3                | 1.08 (s)                         | C-4               | C-3/C-5/ C-24     |  |
| 25                    | 15.3                | 0.79 (s)                         | C-10              | C-1/C-5           |  |
| 26                    | 16.7                | 0.88 (s)                         | C-8               | C-7               |  |
| 27                    | 25.0                | 1.04 (s)                         | -                 | C-8               |  |
| 28                    | 20.4                | 0.74 (s)                         | C-17              | C16/C18/C-22      |  |
| 29                    | 32.7                | 0.96 (s)                         | C-20              | C-19/C-21         |  |
| 30                    | 28.4                | 0.96 (s)                         | C-20              | C-19/C-21         |  |

**Table 2.** Data of  $^{13}\text{C}$  and  $^1\text{H}$  NMR data of **25** in DMSO- $d_6$  (100 and 500 MHz) of the sugars of Soyasaponin II [30].

| C    | HSQC                |                                                                 | HMBC              |                   |
|------|---------------------|-----------------------------------------------------------------|-------------------|-------------------|
|      | $\delta_{\text{C}}$ | $\delta_{\text{H}}$                                             | $^2J_{\text{CH}}$ | $^3J_{\text{CH}}$ |
| 1'   | 103.9               | 4.13 (d, $J = 6.0$ Hz)                                          | -                 | C-3               |
| 2'   | 77.2                | 3.33 (m)                                                        | C-1'              | C-1''             |
| 3'   | 77.1                | 3.30 (m)                                                        | -                 | -                 |
| 4'   | 73.8                | 3.17 (m)                                                        | -                 | -                 |
| 5'   | 76.4                | 3.12 (m)                                                        | -                 | -                 |
| 6'   | 172.8               | -                                                               | -                 | -                 |
| 1''  | 100.7               | 4.68 (d, $J = 7.0$ Hz)                                          | -                 | -                 |
| 2''  | 77.6                | 3.16 (m)                                                        | -                 | C-1'''            |
| 3''  | 70.7                | 3.49 (m)                                                        | -                 | -                 |
| 4''  | 69.5                | 3.23 (m)                                                        | -                 | -                 |
| 5''  | 65.4                | 3.60 (dd, $J = 4.5$ and $11.0$ Hz) e<br>2.92 (t, $J = 11.0$ Hz) | -                 | -                 |
| 1''' | 100.3               | 4.97 (sl)                                                       | C-2'''            | C-2'''/C-5'''     |
| 2''' | 70.7                | 3.65 (sl)                                                       | -                 | -                 |
| 3''' | 72.5                | 3.05 (m)                                                        | -                 | -                 |
| 4''' | 72.6                | 3.13 (m)                                                        | -                 | -                 |
| 5''' | 68.1                | 3.51 (m)                                                        | -                 | -                 |
| 6''' | 17.9                | 1.06 (d)                                                        | C-5'''            | C-4'''            |

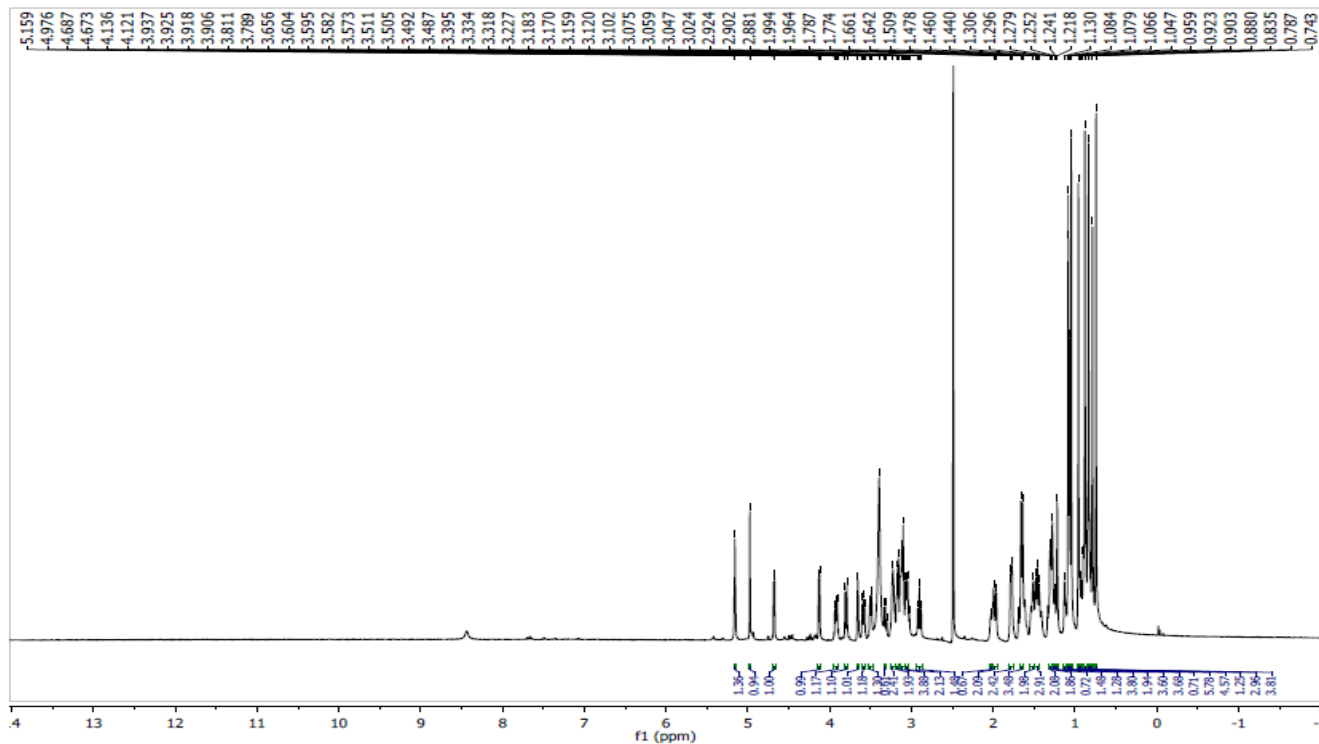

Figure S1.  $^1\text{H-NMR}$  (500 MHz,  $\text{DMSO-}d_6$ ) spectrum of compound **25**.

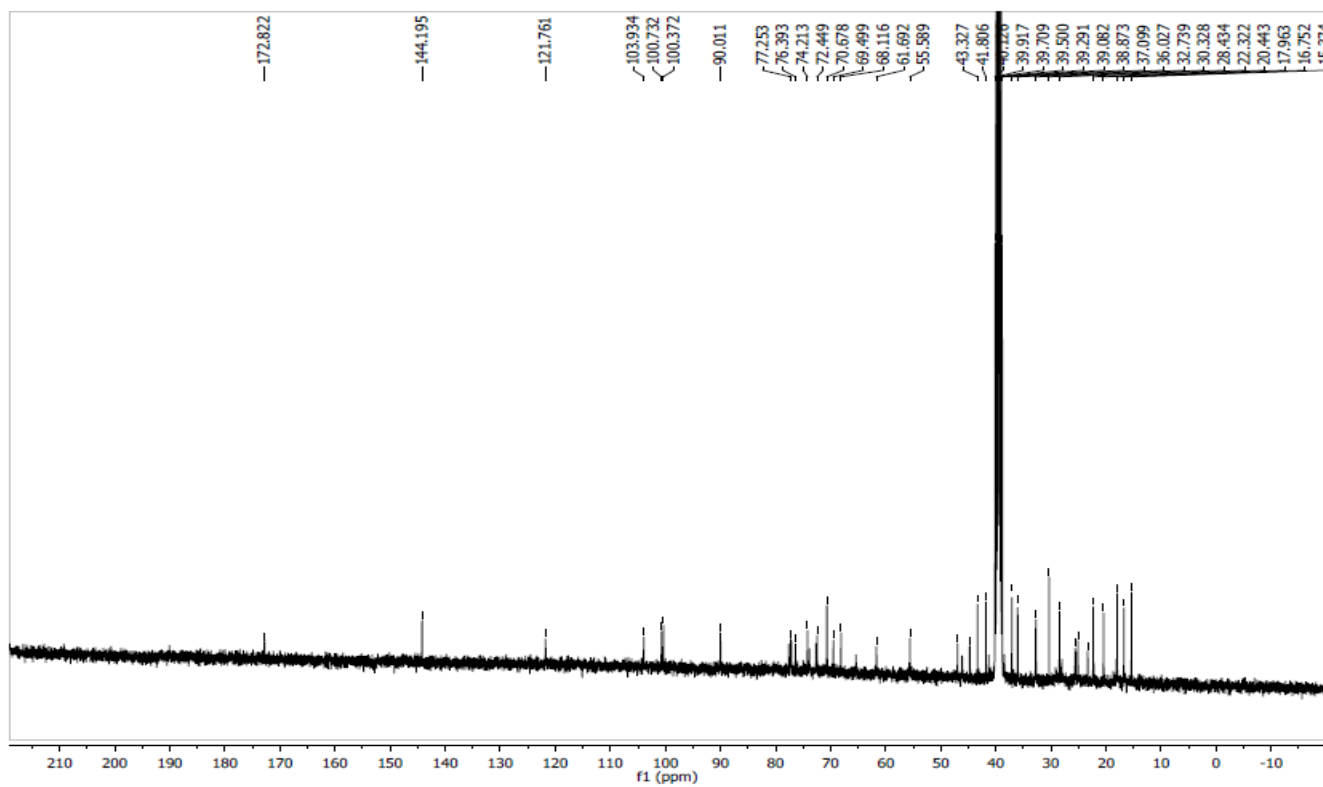

Figure S2.  $^{13}\text{C-NMR}$  (100 MHz,  $\text{DMSO-}d_6$ ) spectrum of compound **25**.

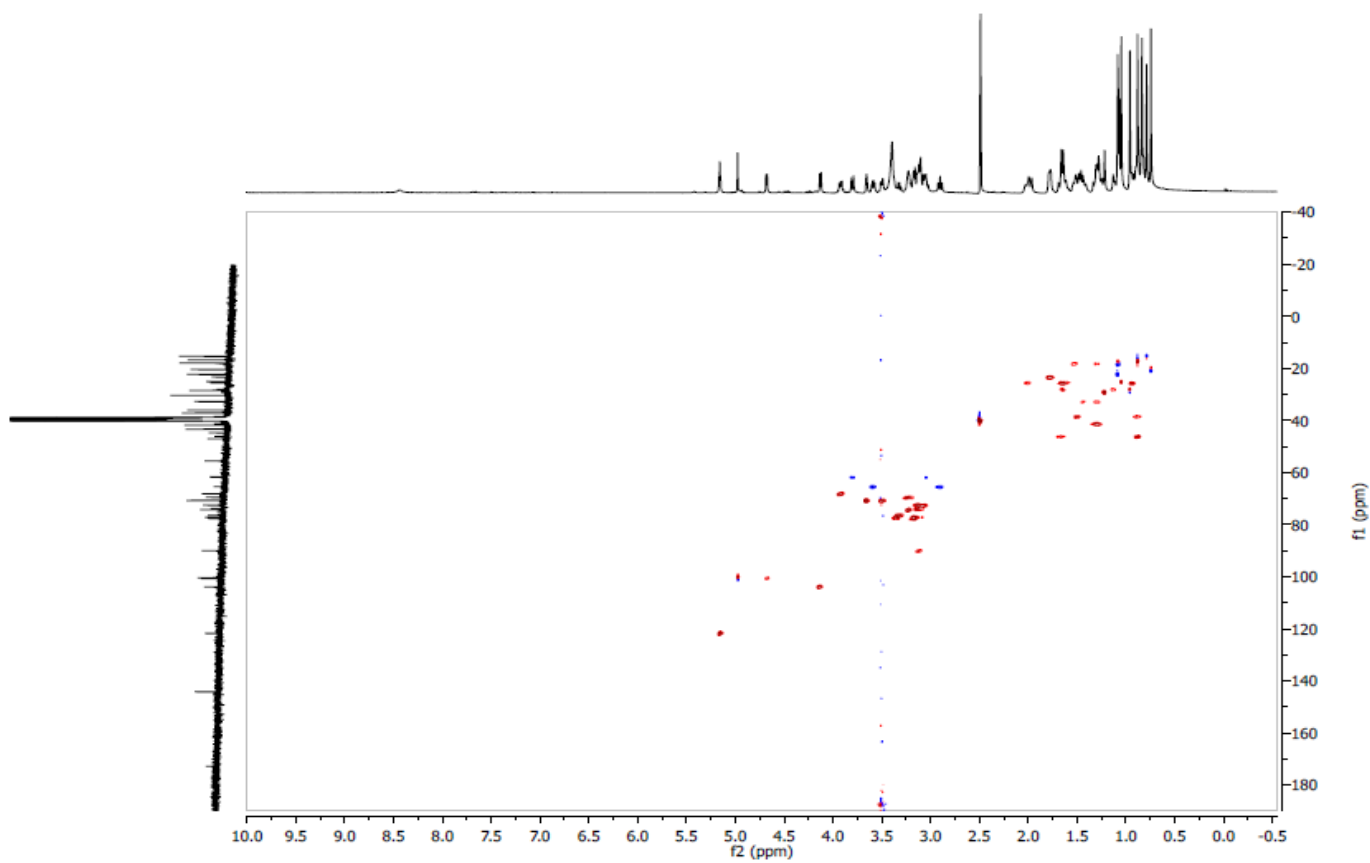

**Figure S3.** HSQC (500 x 125 MHz, DMSO- $d_6$ ) spectrum of compound **25**.

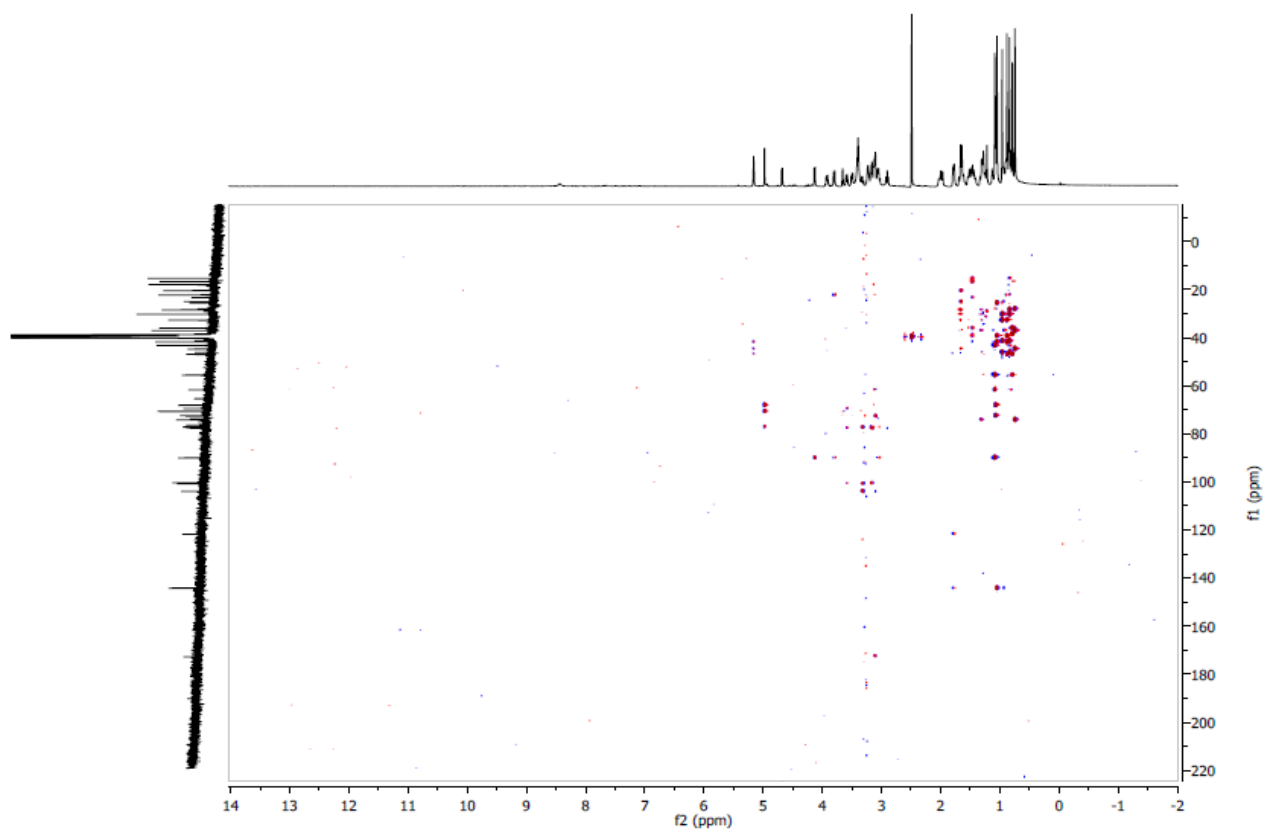

**Figure S4.** HMBC (500 x 125 MHz, DMSO- $d_6$ ) spectrum of compound **25**

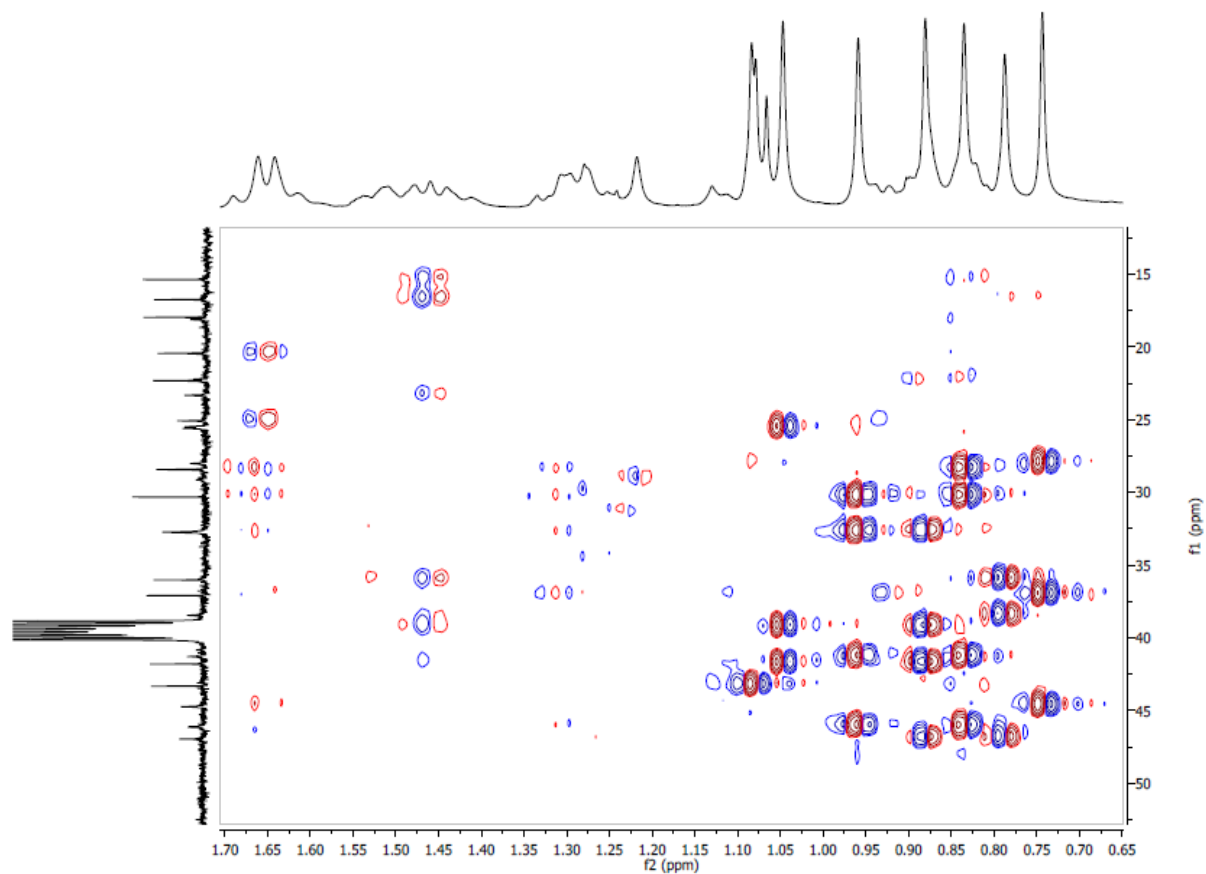

**Figure S5.** Expansion of HMBC (500 x 125 MHz, DMSO- $d_6$ ) spectrum of compound **25**.

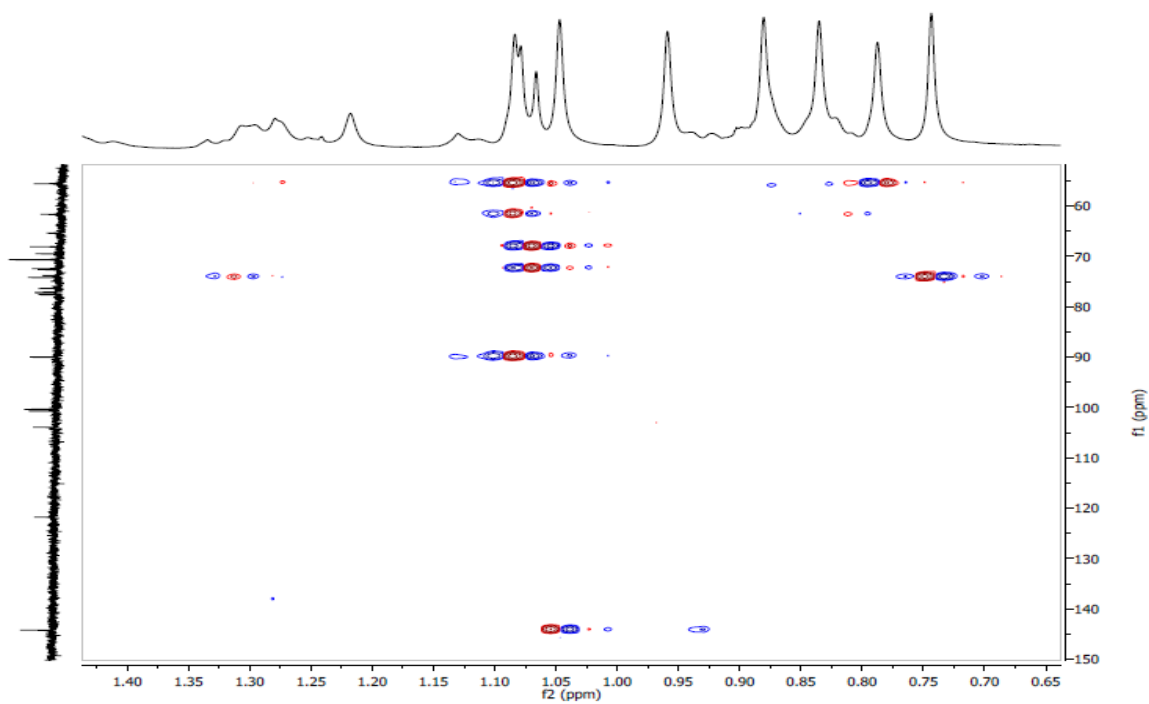

**Figure S6.** Expansion of HMBC (500 x 125 MHz, DMSO- $d_6$ ) spectrum of compound **25**.

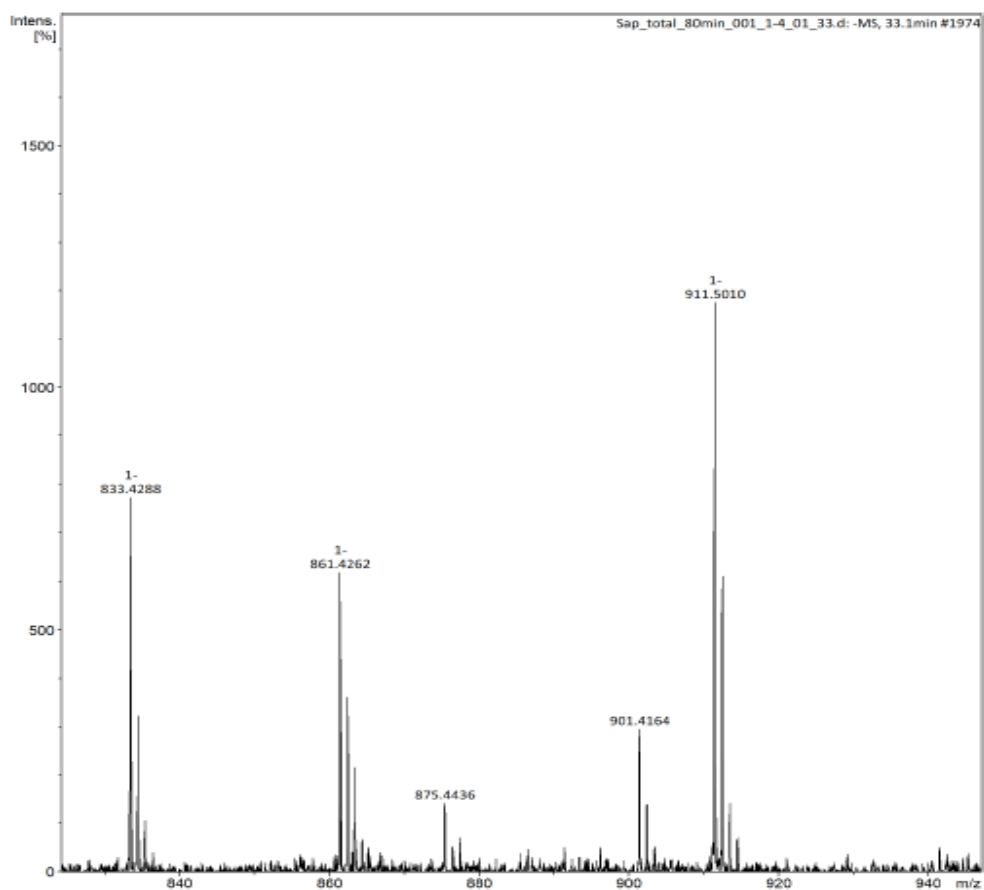

**Figure S7.** The HRESI-TOF-MS spectrum of compound **25**.

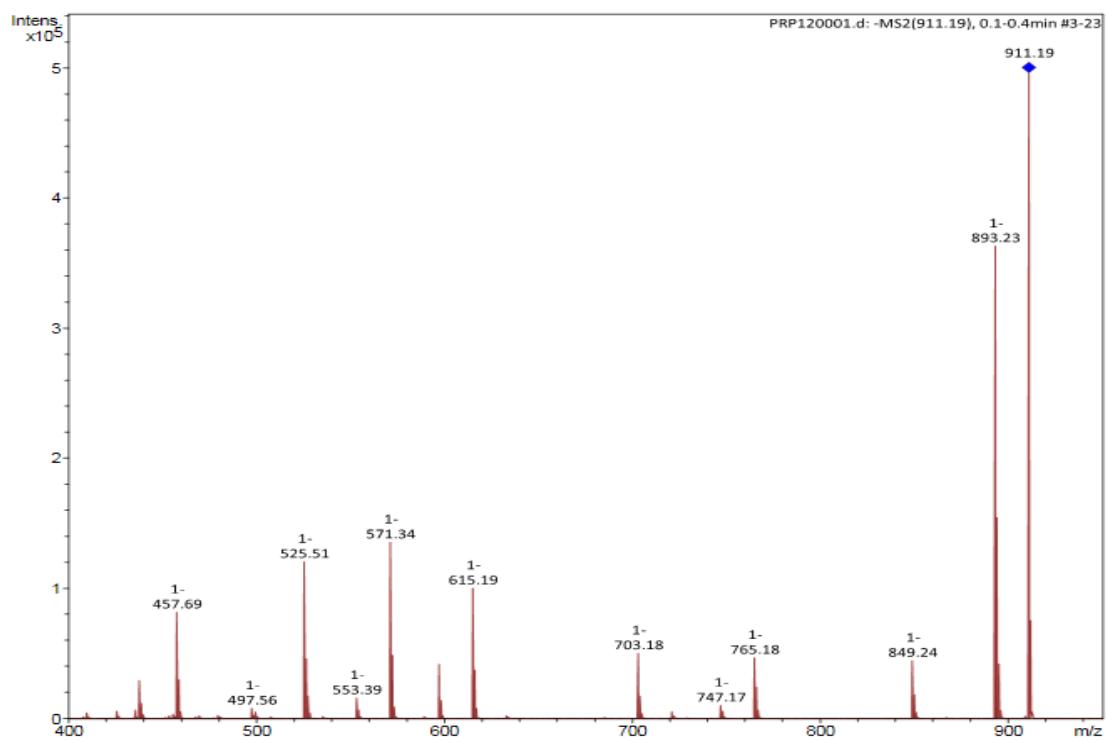

**Figure S8.** The ESI-MS/MS spectrum of compound **25**.



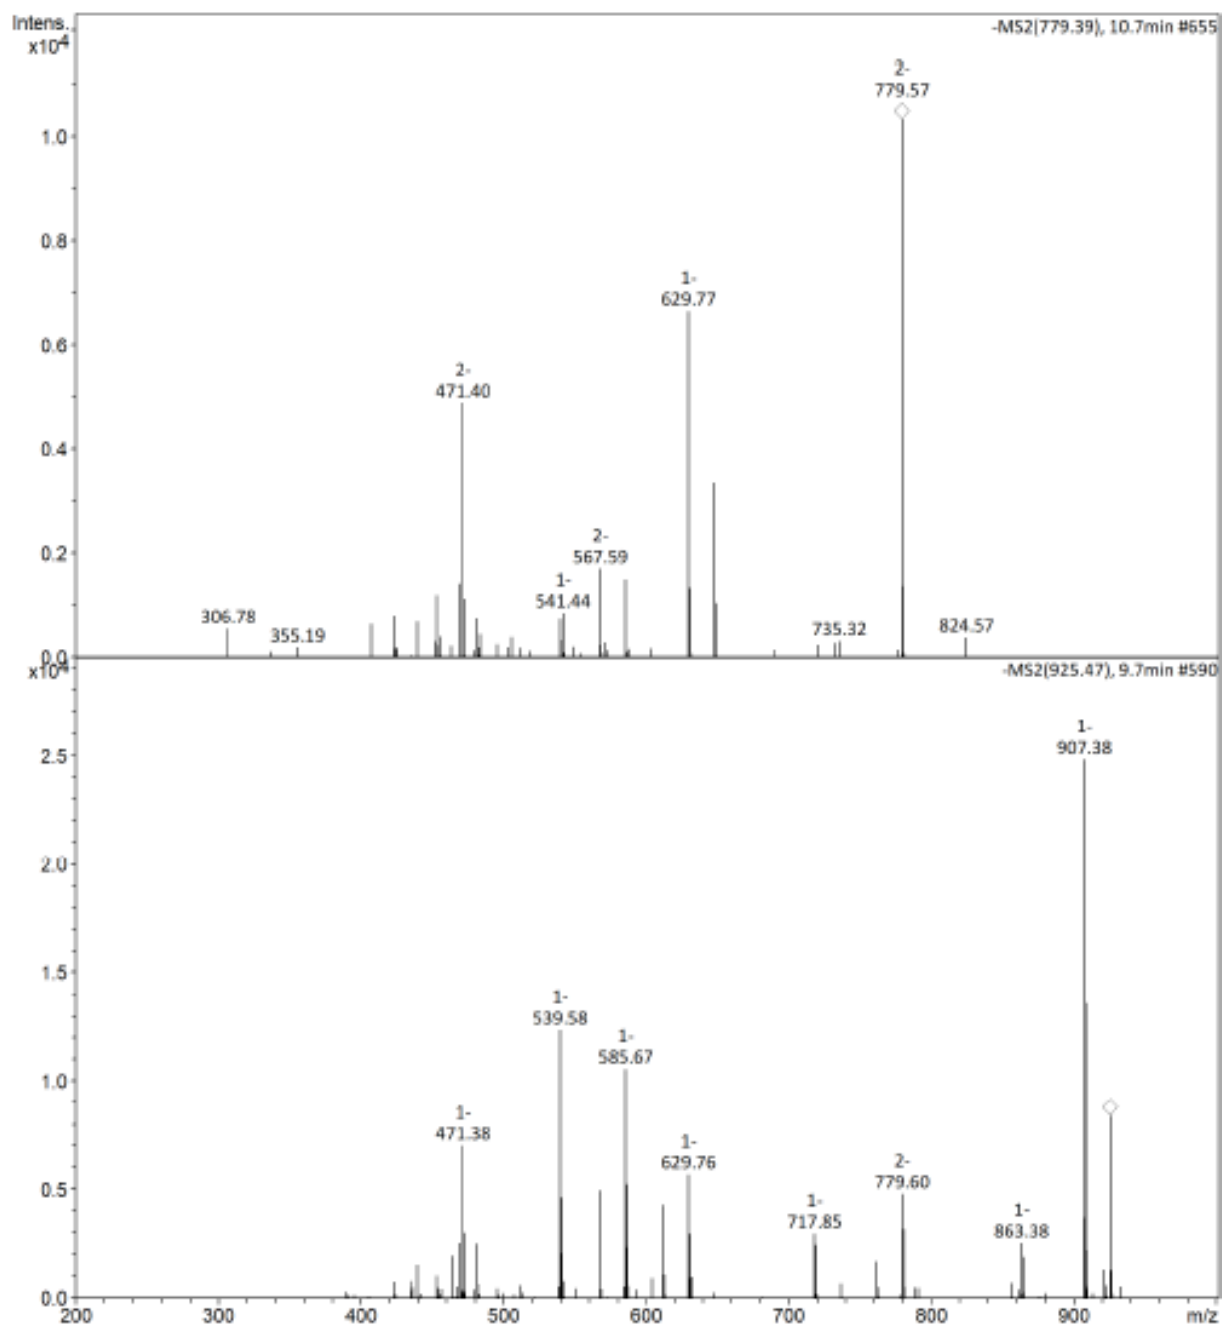

**Figure S9.** The ESI-MS/MS spectrum of compounds 1 and 2.

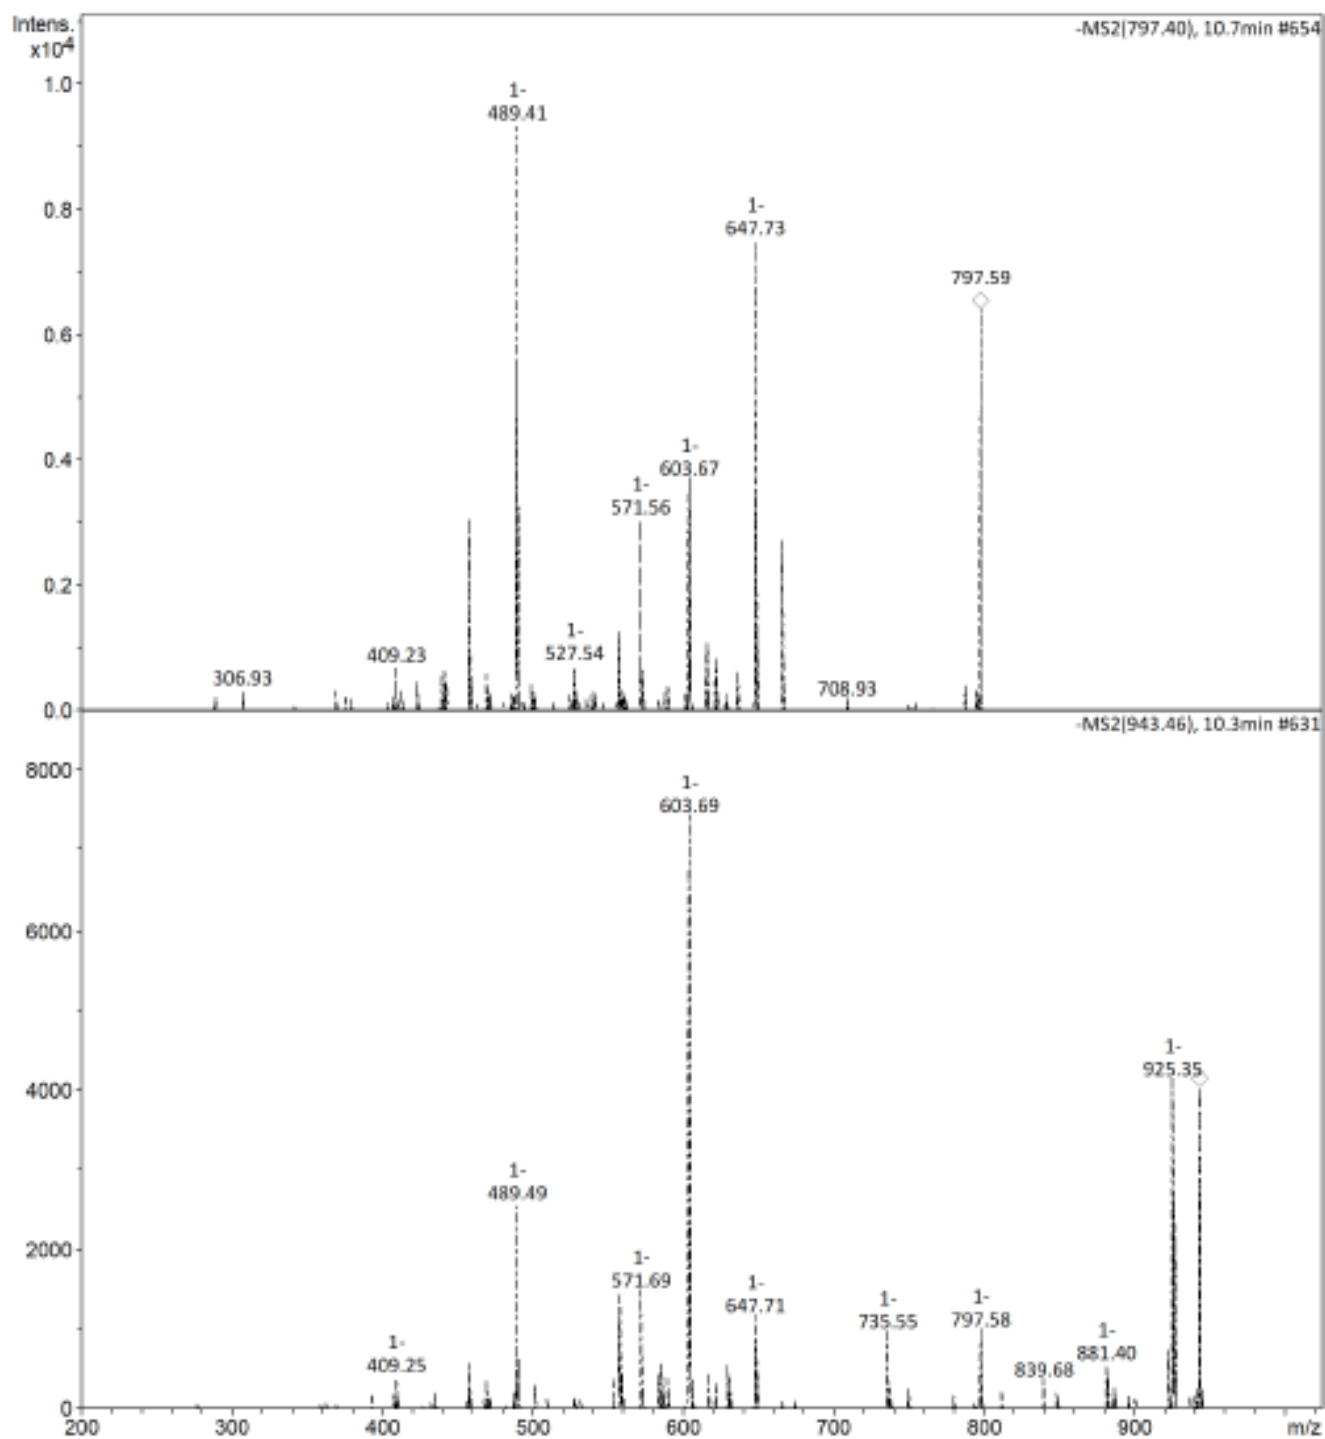

**Figure S10.** The ESI-MS/MS spectrum of compounds **3** and **4**.

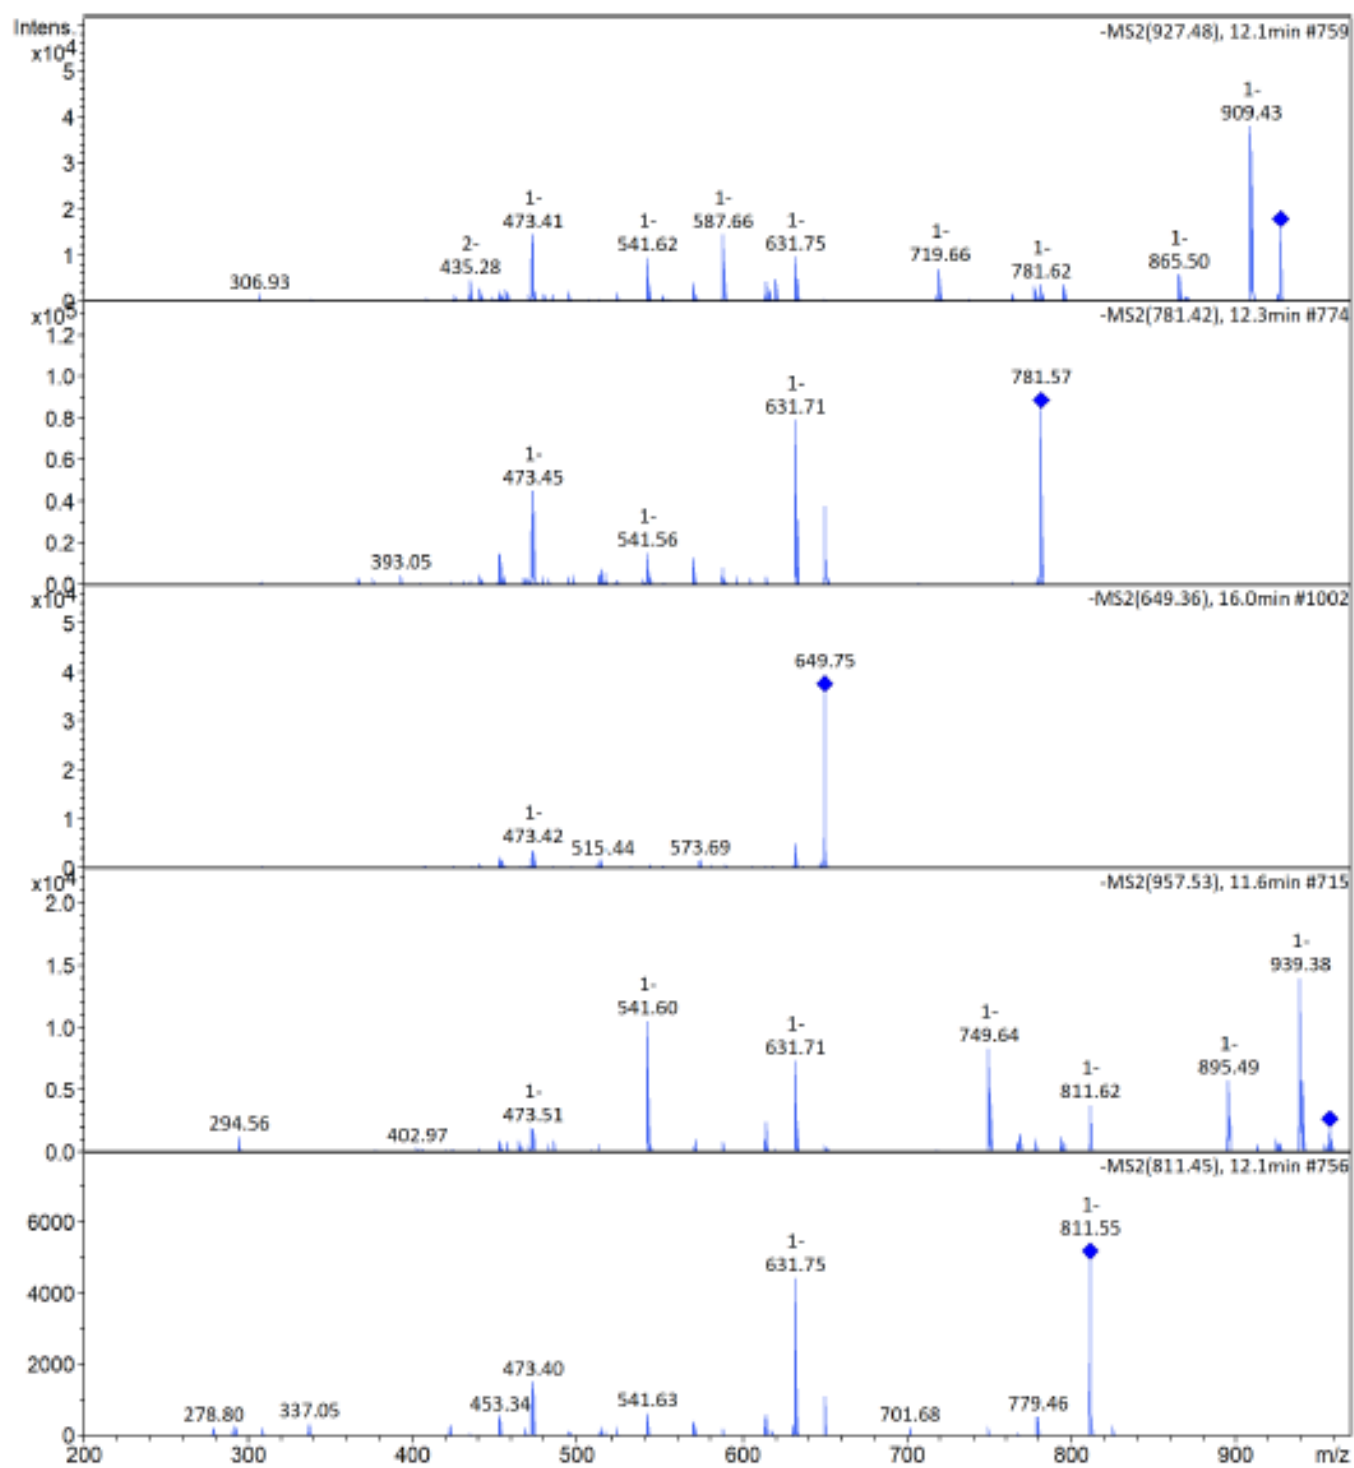

**Figure S11.** The ESI-MS/MS spectrum of compounds **5**, **6**, **7**, **8** and **14**.

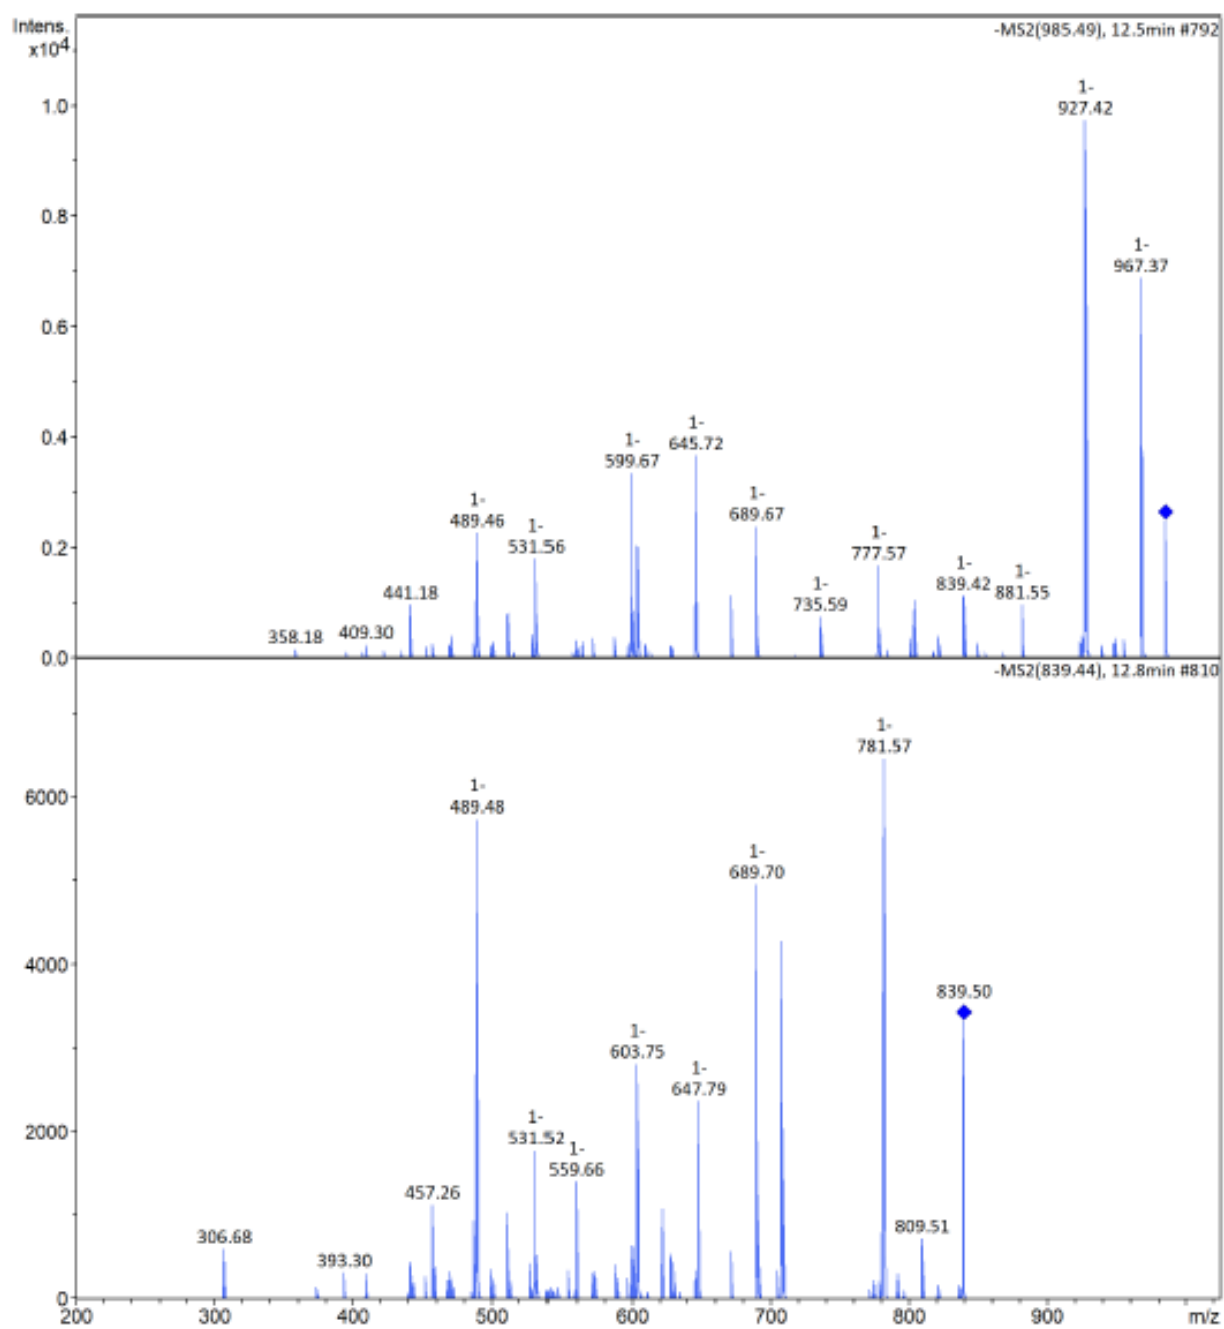

**Figure S12.** The ESI-MS/MS spectrum of compounds **9** and **10**.

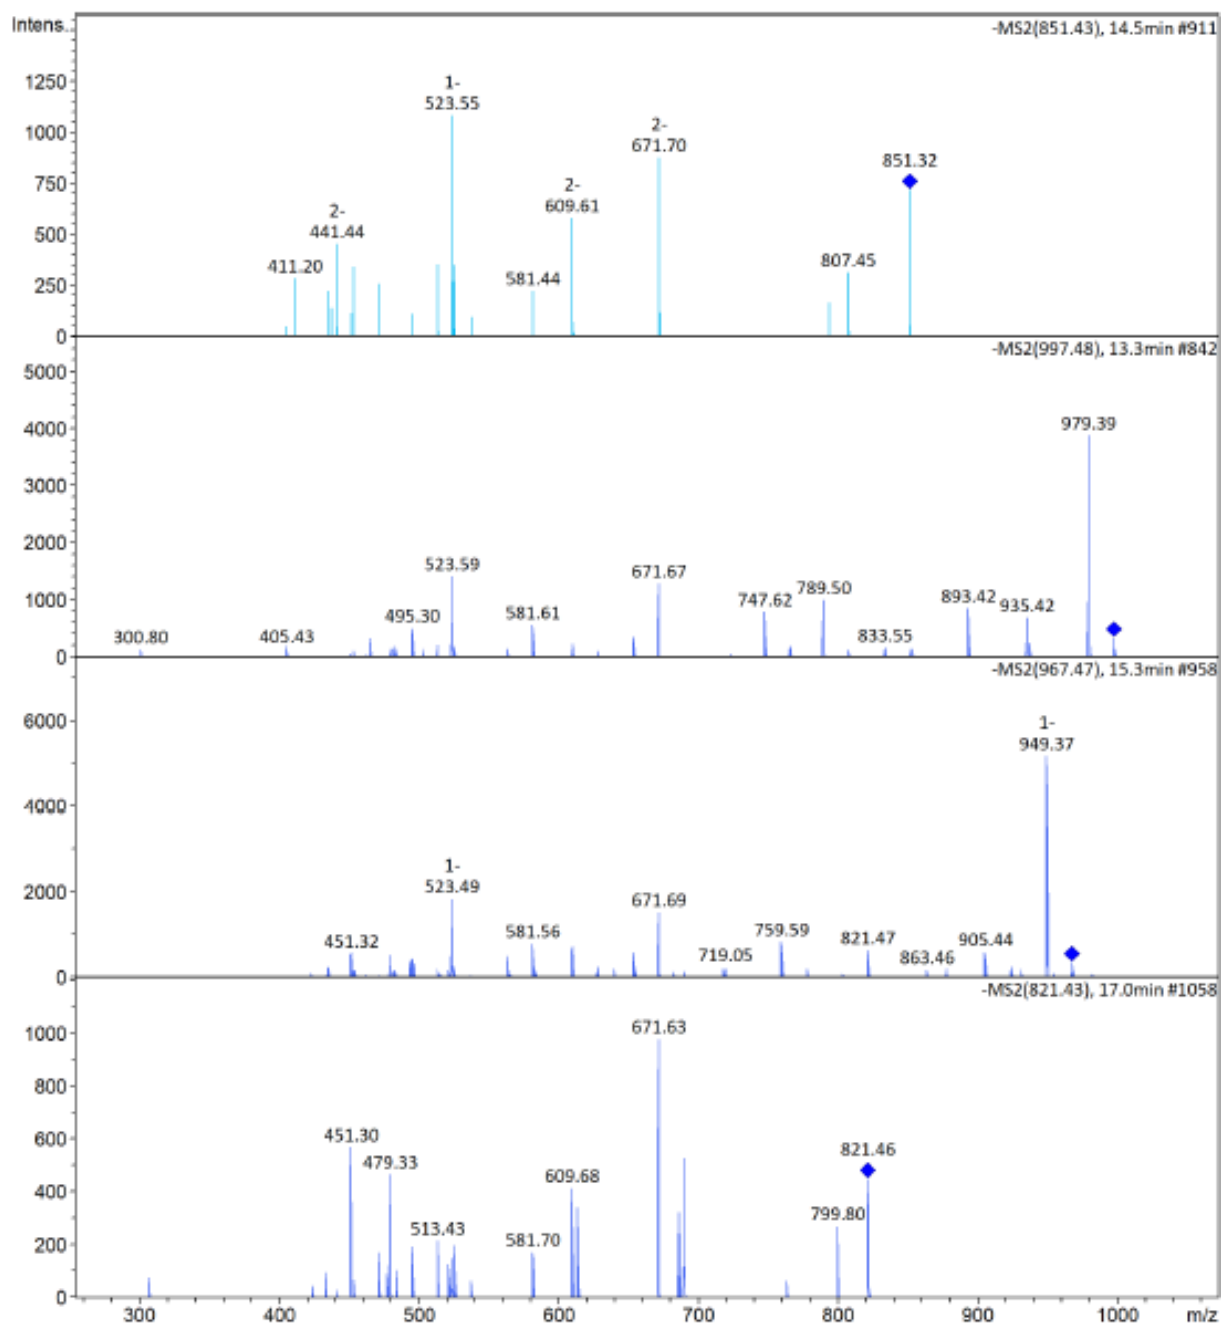

Figure S13. The ESI-MS/MS spectrum of compounds 11, 12, 13 and 15.

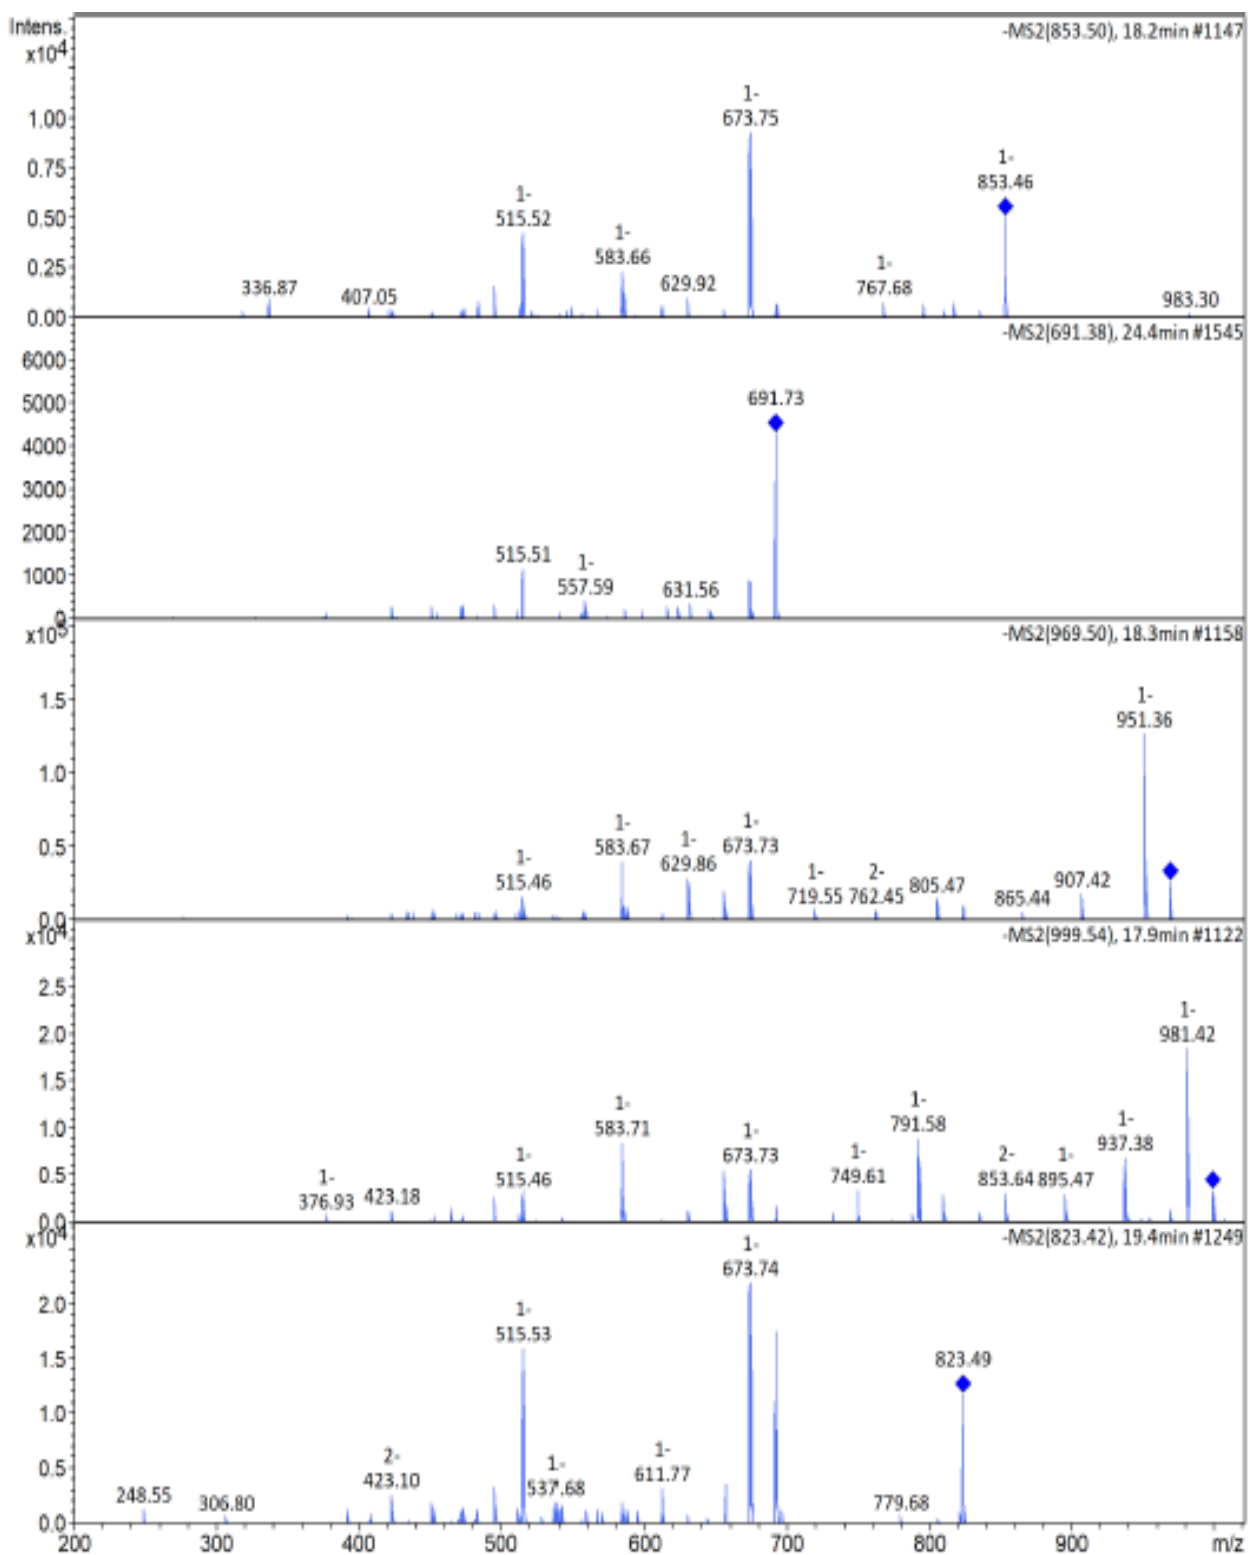

**Figure S14.** The ESI-MS/MS spectrum of compounds **16**, **17**, **18**, **19** and **22**.

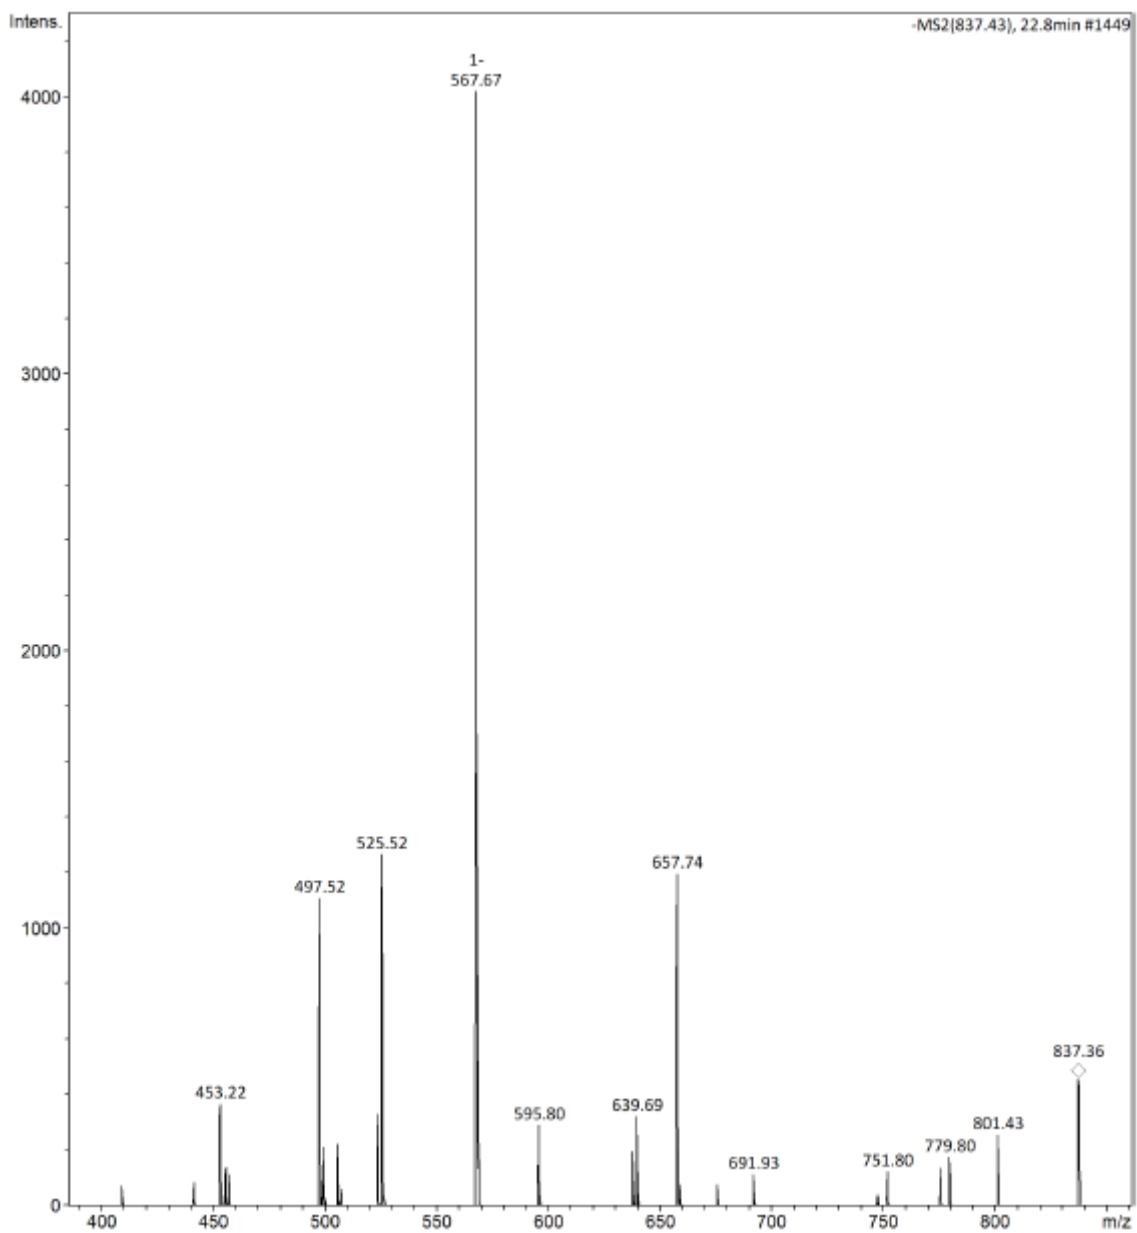

**Figure S15.** The ESI-MS/MS spectrum of compound **20**.

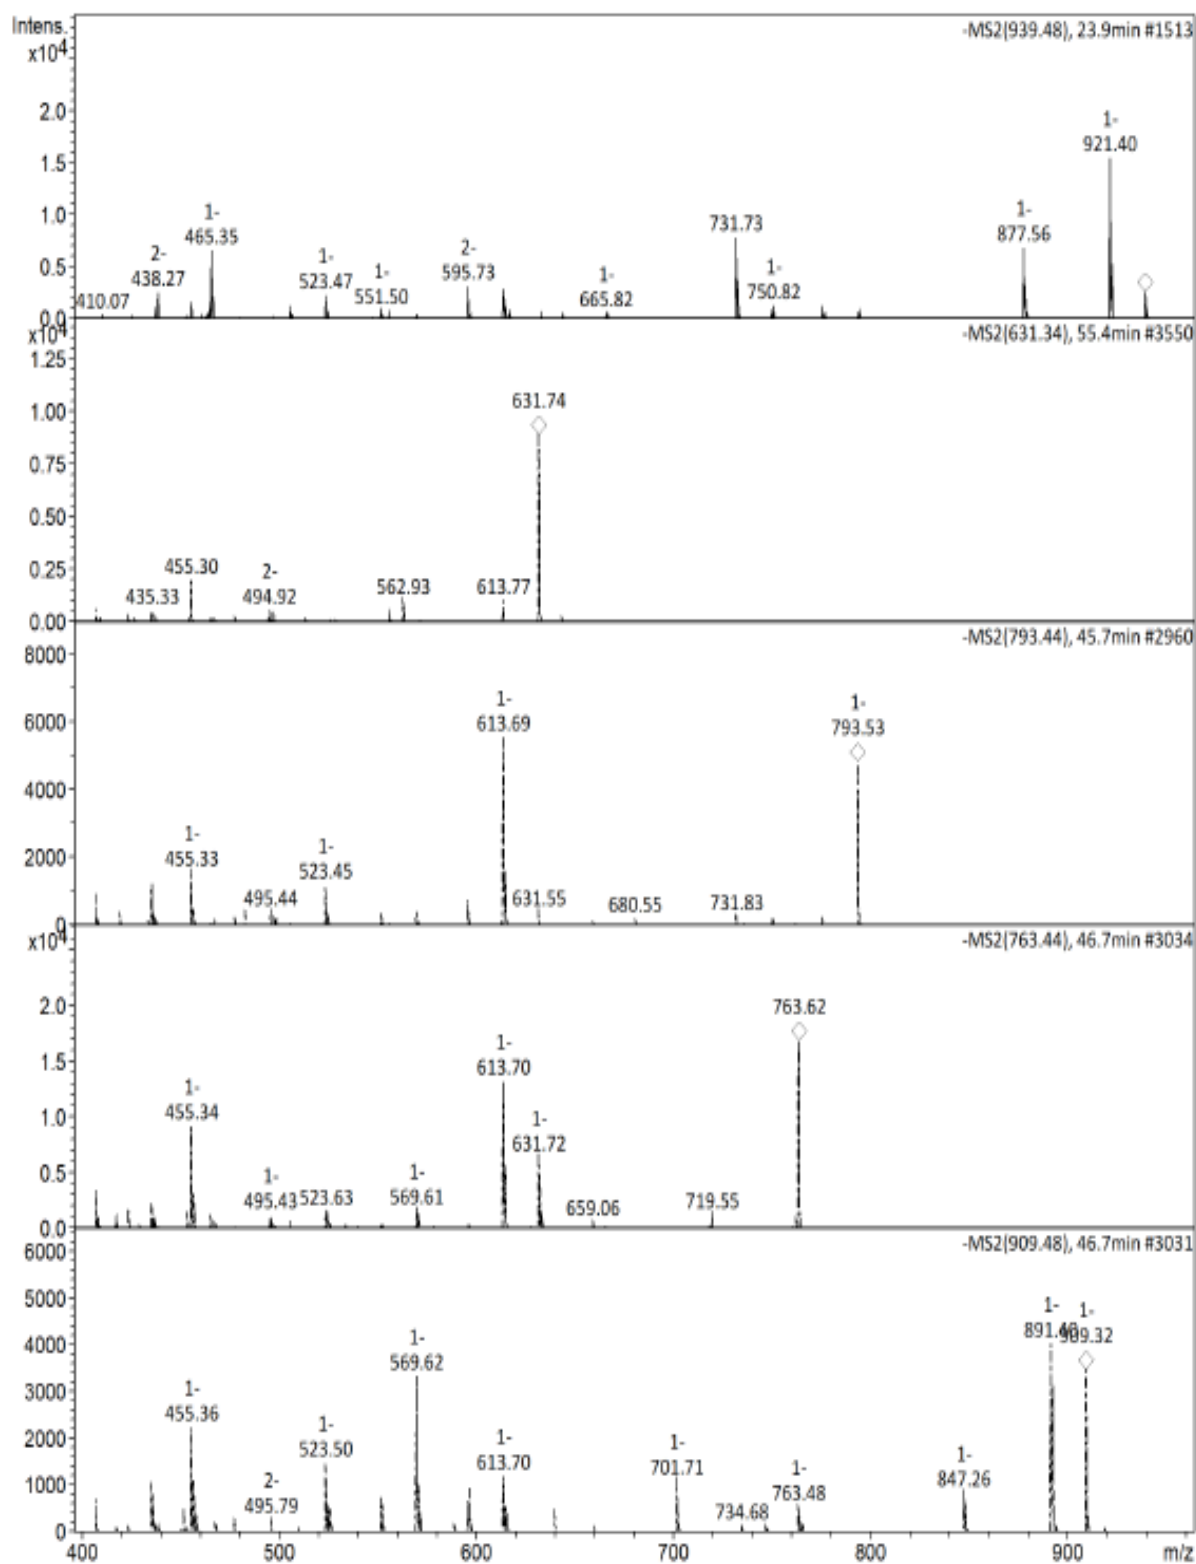

**Figure S16.** The ESI-MS/MS spectrum of compounds **21**, **31**, **32**, **33** and **35**.



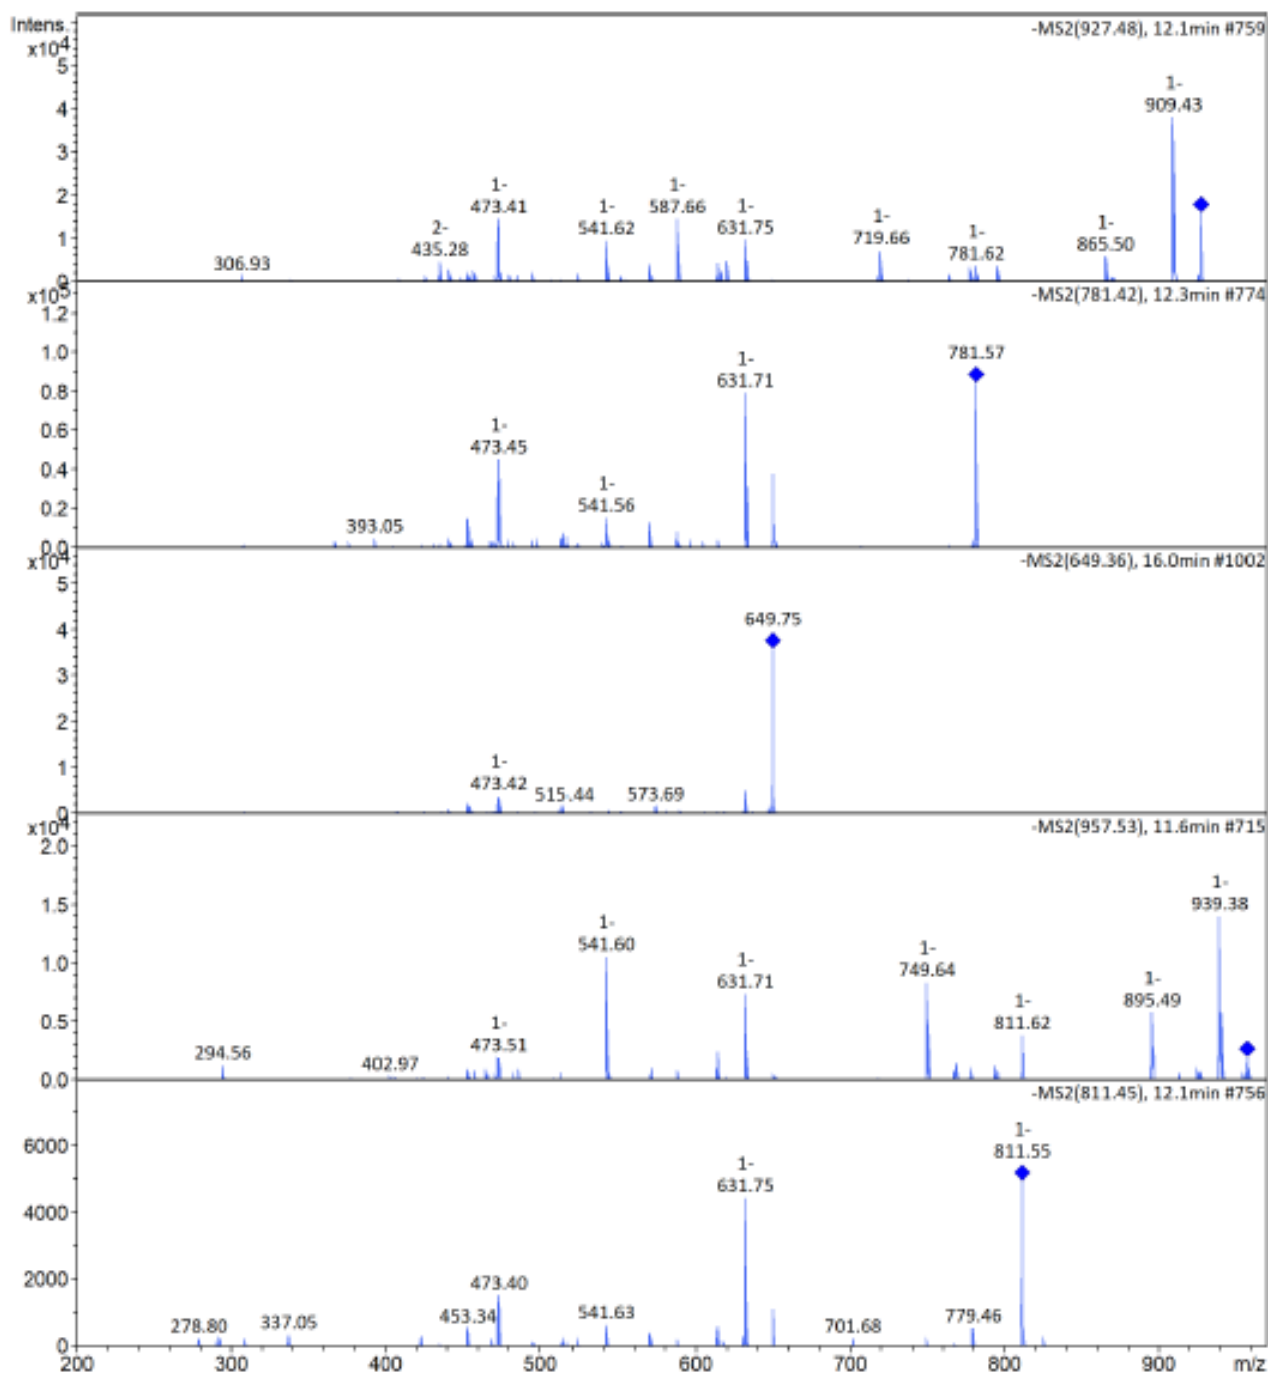

**Figure S17.** The ESI-MS/MS spectrum of compounds **22**, **24**, **25**, **26**, and **29**.

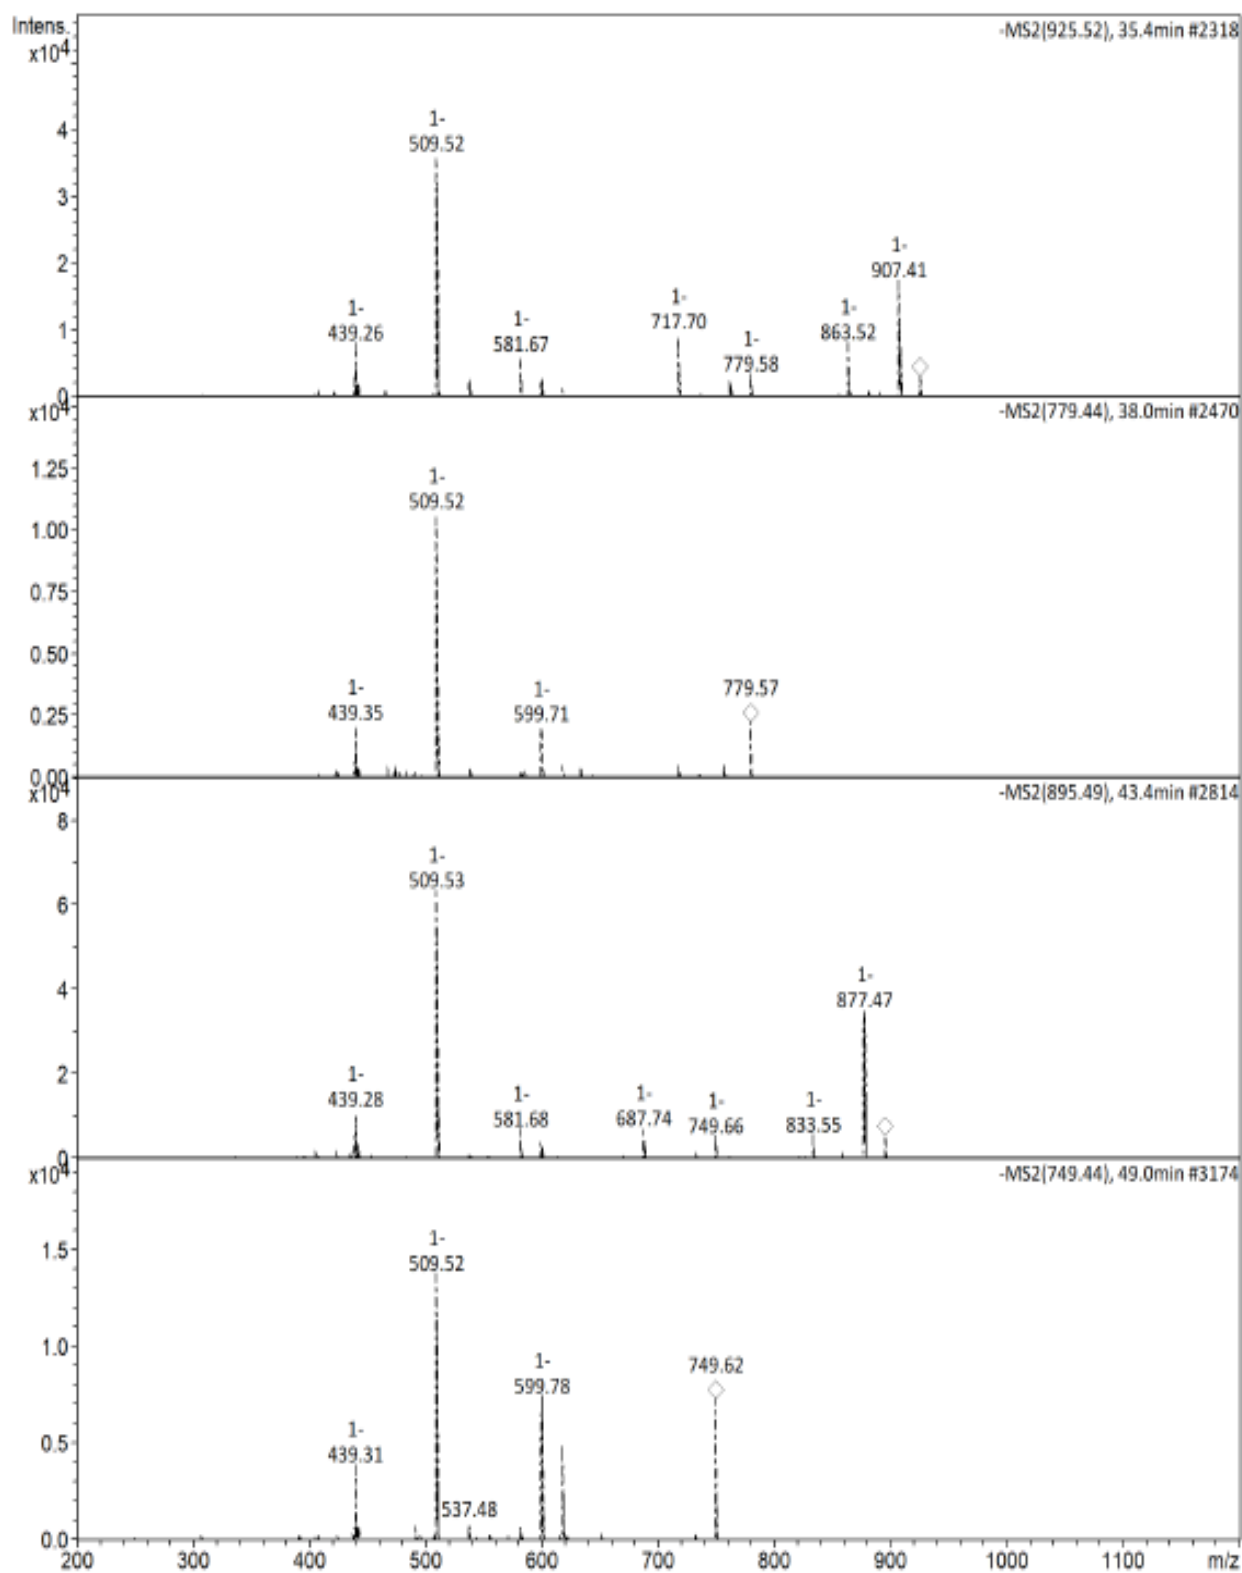

**Figure S18.** The ESI-MS/MS spectrum of compounds **27**, **28**, **30** and **34**.

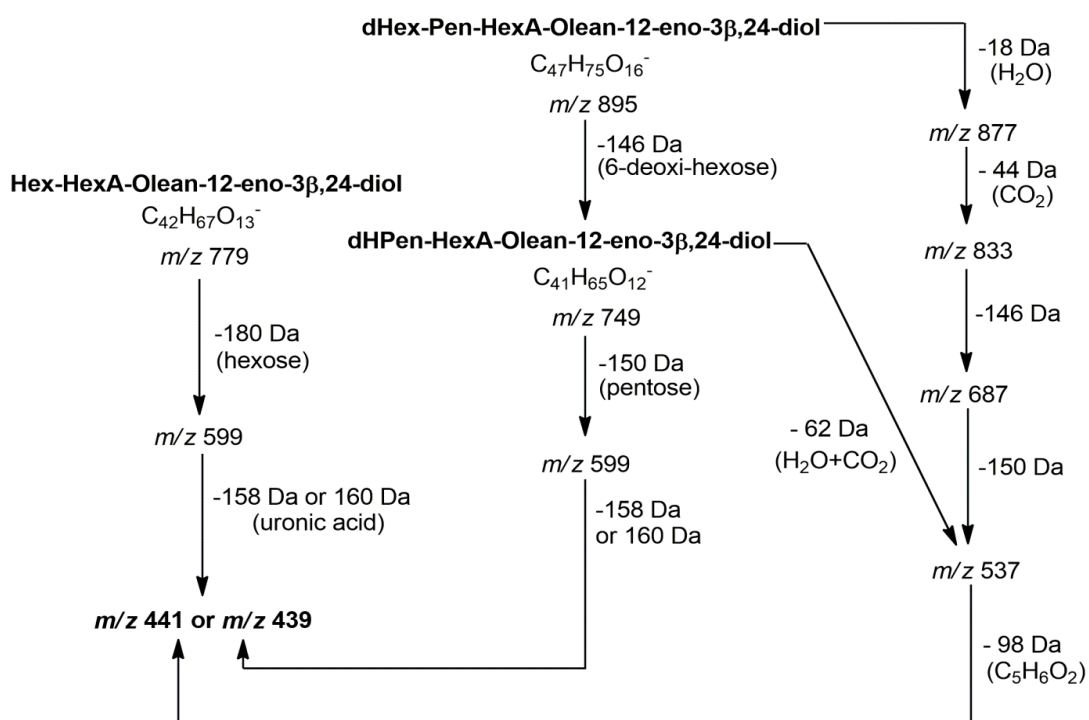

**Figure S19.** Fragmentation pathway of compounds **28** ( $m/z$  779.4562), **30** ( $m/z$  895.5043) and **34** ( $m/z$  749.4485) having olean-12-ene-3 $\beta$ ,diol ( $m/z$  441 or 439) as aglycone in negative mode ESI-MS/MS.

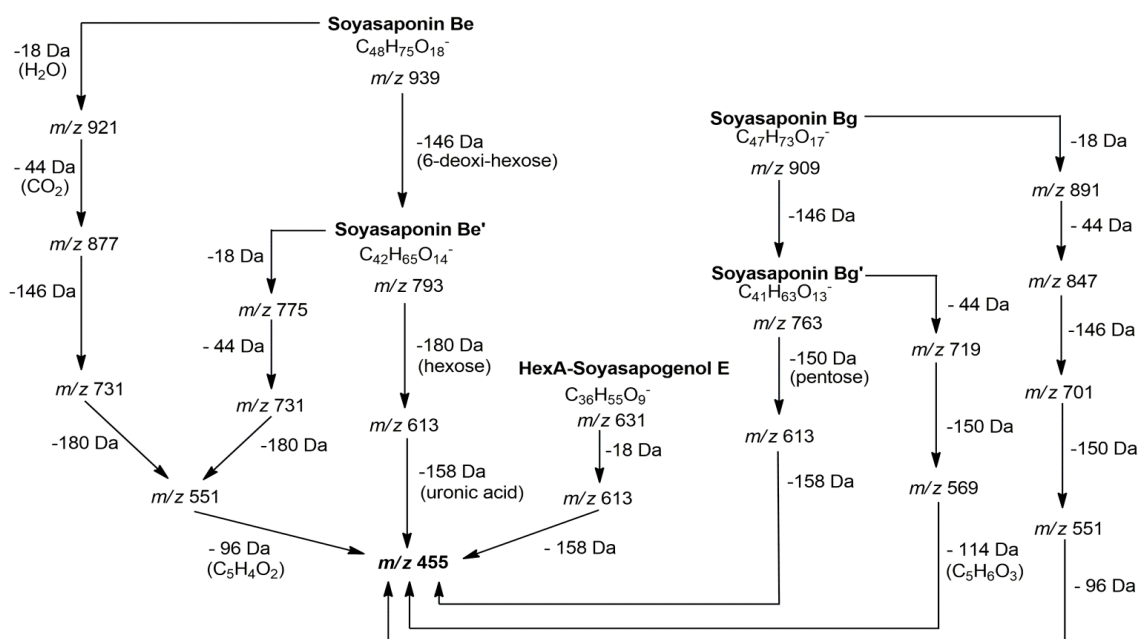

**Figure S20.** Fragmentation pathway of compounds **21** ( $m/z$  939.4935), **31** ( $m/z$  793.4348), **32** ( $m/z$  909.4843), **33** ( $m/z$  763.4286) and **35** ( $m/z$  631.3856), which have soyasapogenol E ( $m/z$  455) as aglycone, in negative mode ESI-MS/MS.

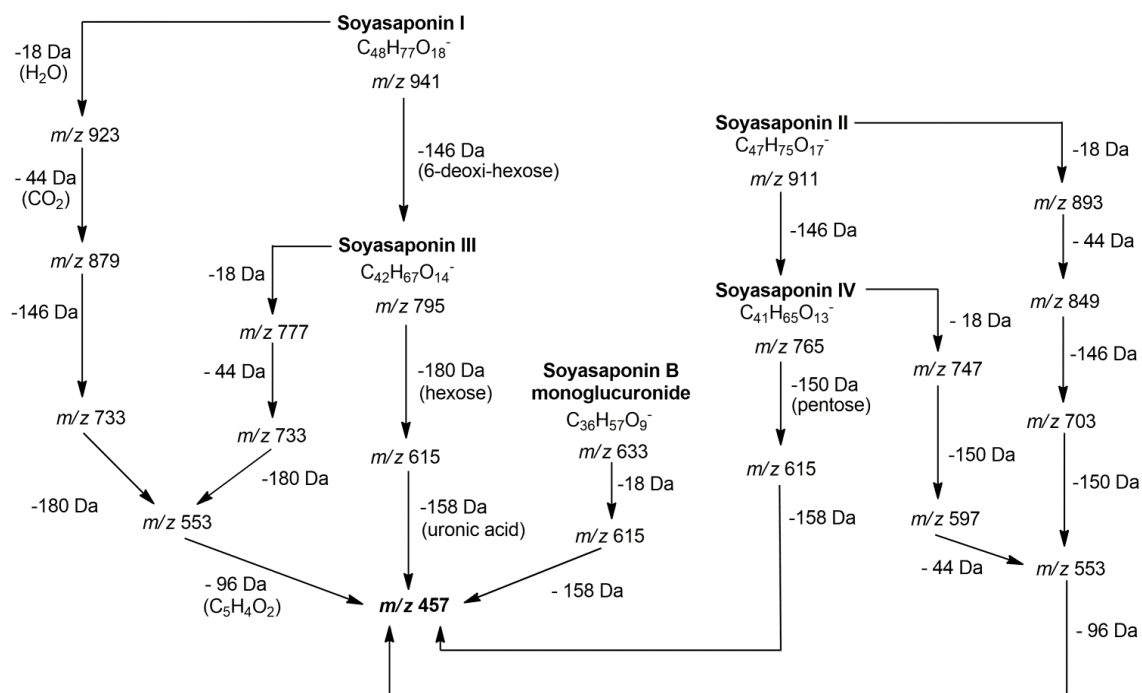

**Figure S21.** Fragmentation pathway of compounds **23** ( $m/z$  941.5123), **24** ( $m/z$  795.4520), **25** ( $m/z$  911.5006), **26** ( $m/z$  765.4418) and **29** ( $m/z$  633.3998), which possess soyasapogenol B ( $m/z$  457) as aglycone, in negative mode ESI-MS/MS.

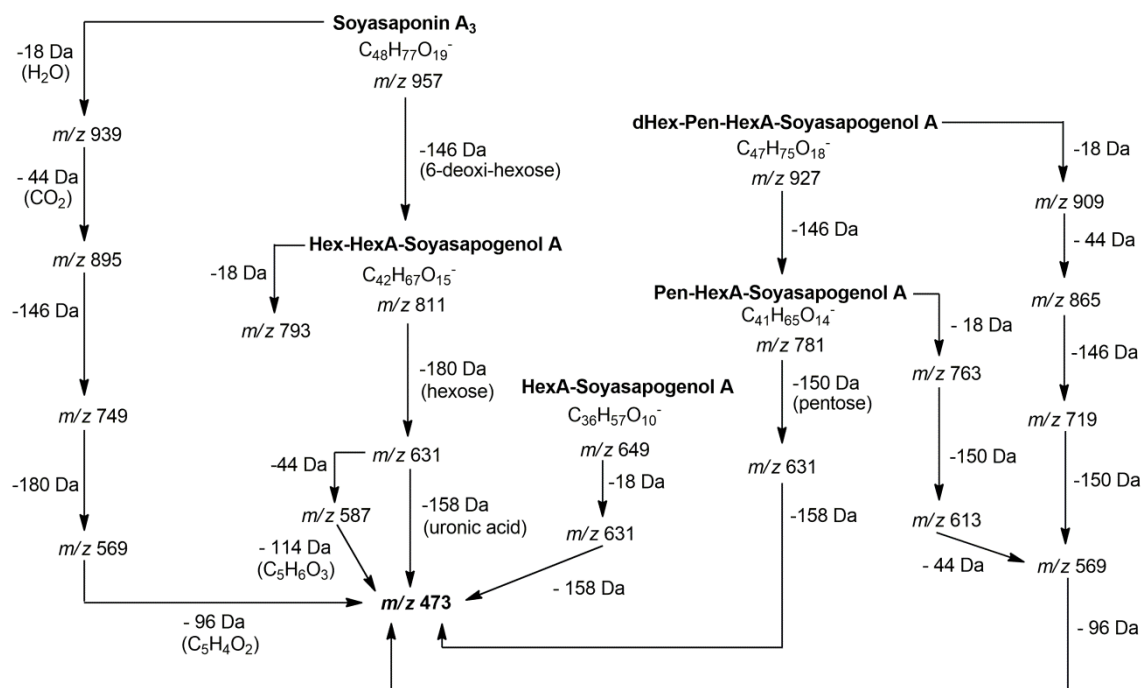

**Figure S22.** Fragmentation pathway of compounds **5** ( $m/z$  957.5056), **8** ( $m/z$  811.4459), **6** ( $m/z$  927.4943), **7** ( $m/z$  781.4350) and **14** ( $m/z$  649.3933), which have soyasapogenol A ( $m/z$  473) as aglycone, in negative mode ESI-MS/MS.

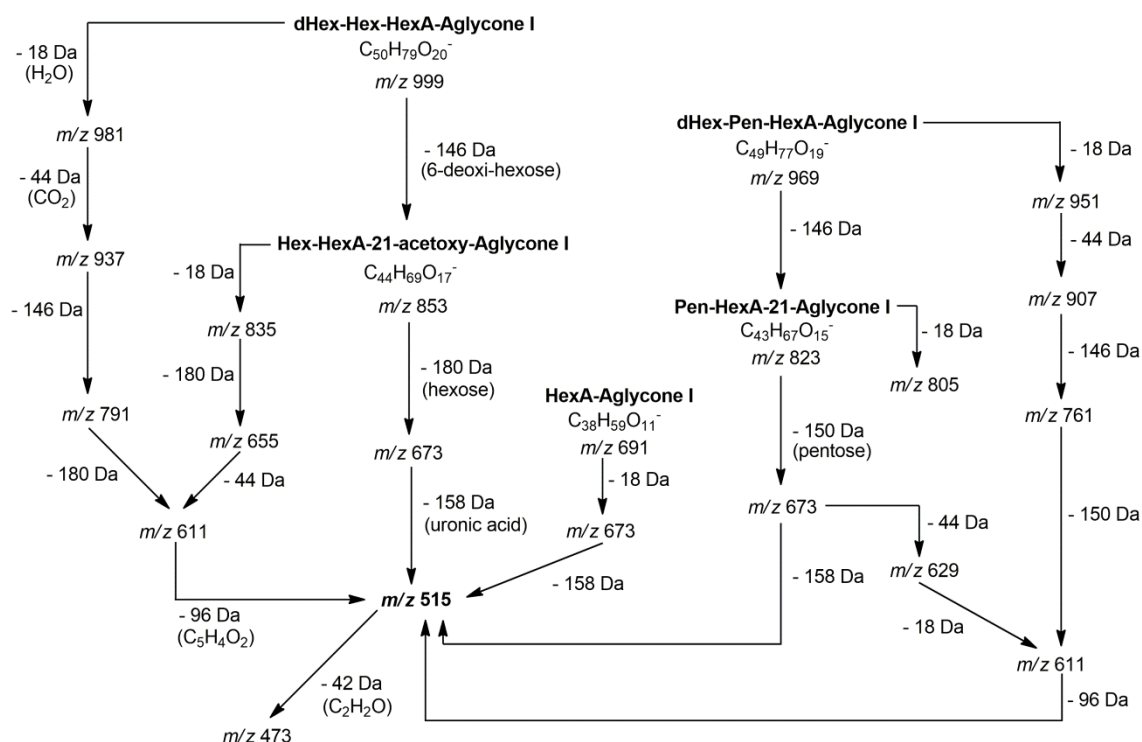

**Figure S23** Fragmentation pathway of compounds **16** ( $m/z$  999.5135), **18** ( $m/z$  853.4559), **17** ( $m/z$  969.5074), **19** ( $m/z$  823.4463) and **22** ( $m/z$  691.4042), which have Aglycone I ( $m/z$  515) as aglycone, in negative mode ESI-MS/MS.

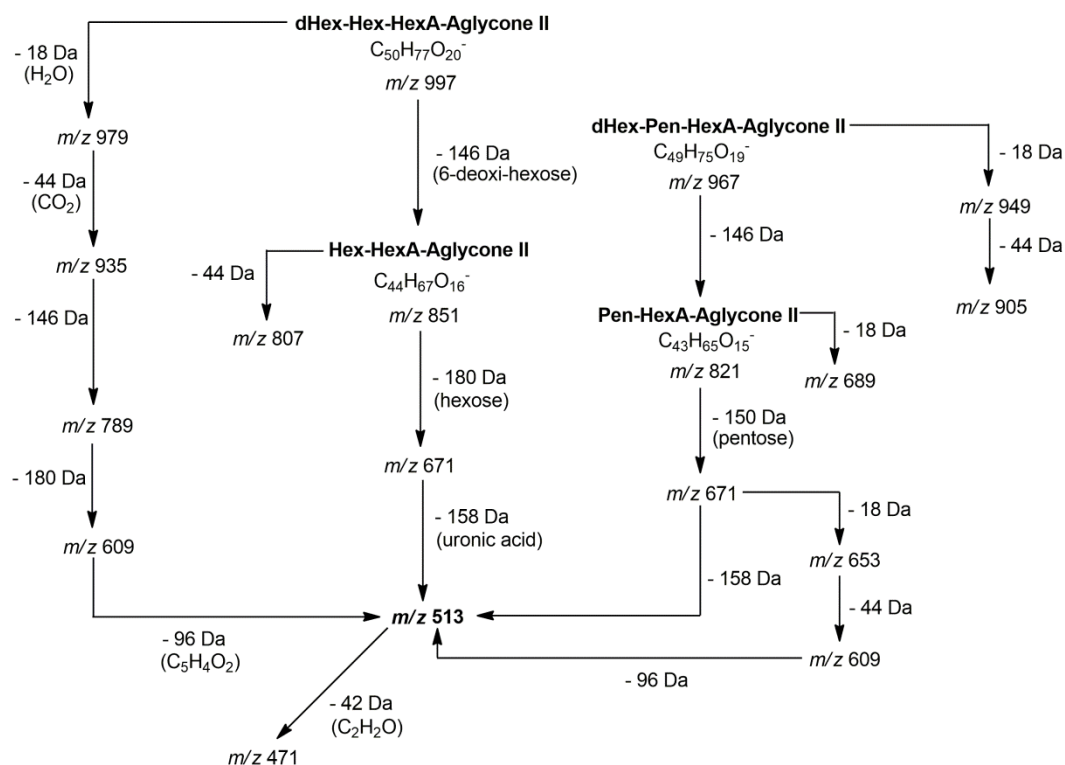

**Figure S24.** Fragmentation pathway of compounds **11** ( $m/z$  997.5022), **12** ( $m/z$  851.4412), **13** ( $m/z$  967.4901) and **15** ( $m/z$  821.4303), which have Aglycone II ( $m/z$  513) as aglycone, in negative mode ESI-MS/MS.

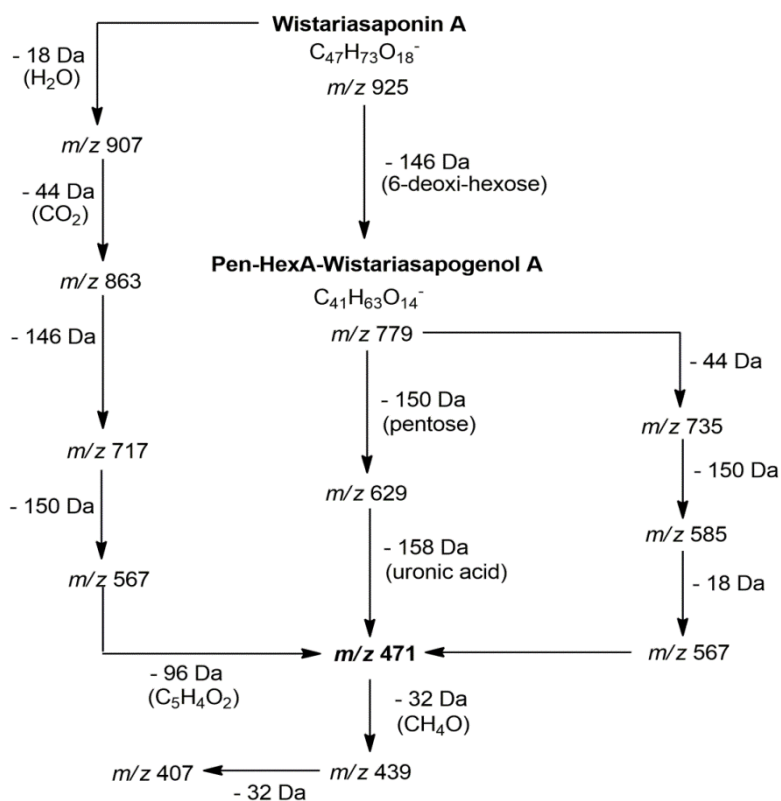

**Figure S25.** Fragmentation pathway of compounds **1** ( $m/z$  925.4800) and **2** ( $m/z$  779.4239), which have wistariasapogenol A ( $m/z$  471) as aglycone, in negative mode ESI-MS/MS.

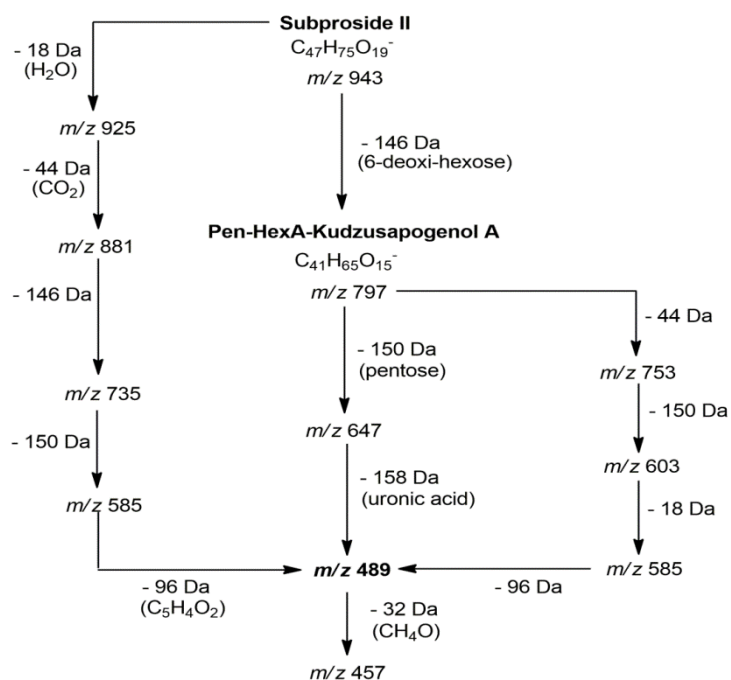

**Figure S26.** Fragmentation pathway of compounds **3** ( $m/z$  797.4310) and **4** ( $m/z$  943.4912), which have kudzusapogenol A ( $m/z$  485) as aglycone, in negative mode ESI-MS/MS.

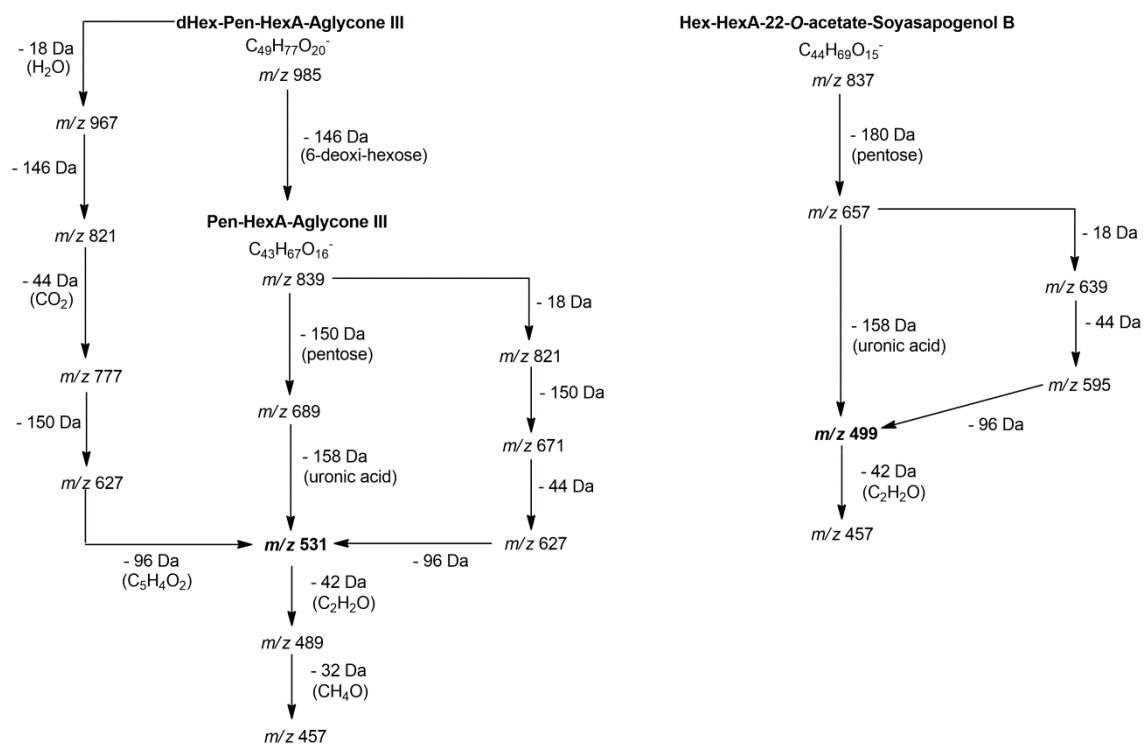

**Figure S27.** Fragmentation pathway of compounds **9** ( $m/z$  985.4961) and **10** ( $m/z$  839.4404) having Aglycone III ( $m/z$  531) and that of compound **20** ( $m/z$  837.4603), which has 22-*O*-acetate-soyasapogenol B ( $m/z$  499) as aglycone, in negative mode ESI-MS/MS.
